# Supplementary material for: Accounting for health literacy and intervention preferences when reducing unhealthy snacking: protocol for an online randomised controlled trial
Source: PubMed Central journal article supplement — BMJ Open. 2019 May 28;9(5):e028544. doi: 10.1136/bmjopen-2018-028544 (PMC6549624; doi:10.1136/bmjopen-2018-028544), 2019-05-28
Supplement: bmjopen-2018-028544.draft_revisions.pdf [file bmjopen-2018-028544.draft_revisions.pdf]

# BMJ Open

BMJ Open is committed to open peer review. As part of this commitment we make the peer review history of every article we publish publicly available.

When an article is published we post the peer reviewers' comments and the authors' responses online. We also post the versions of the paper that were used during peer review. These are the versions that the peer review comments apply to.

The versions of the paper that follow are the versions that were submitted during the peer review process. They are not the versions of record or the final published versions. They should not be cited or distributed as the published version of this manuscript.

BMJ Open is an open access journal and the full, final, typeset and author-corrected version of record of the manuscript is available on our site with no access controls, subscription charges or pay-per-view fees (<http://bmjopen.bmj.com>).

If you have any questions on BMJ Open's open peer review process please email [info.bmjopen@bmj.com](mailto:info.bmjopen@bmj.com)

# BMJ Open

## Accounting for health literacy and intervention preferences when reducing unhealthy snacking: Protocol for an online randomized controlled trial

|                               |                                                                                                                                                                                                                                                                                                                                                                                                                                                                                                                                                                                                                                                                                                                                                                                        |
|-------------------------------|----------------------------------------------------------------------------------------------------------------------------------------------------------------------------------------------------------------------------------------------------------------------------------------------------------------------------------------------------------------------------------------------------------------------------------------------------------------------------------------------------------------------------------------------------------------------------------------------------------------------------------------------------------------------------------------------------------------------------------------------------------------------------------------|
| Journal:                      | <i>BMJ Open</i>                                                                                                                                                                                                                                                                                                                                                                                                                                                                                                                                                                                                                                                                                                                                                                        |
| Manuscript ID                 | bmjopen-2018-028544                                                                                                                                                                                                                                                                                                                                                                                                                                                                                                                                                                                                                                                                                                                                                                    |
| Article Type:                 | Protocol                                                                                                                                                                                                                                                                                                                                                                                                                                                                                                                                                                                                                                                                                                                                                                               |
| Date Submitted by the Author: | 19-Dec-2018                                                                                                                                                                                                                                                                                                                                                                                                                                                                                                                                                                                                                                                                                                                                                                            |
| Complete List of Authors:     | Ayre, Julie; The University of Sydney, Faculty of Medicine and Health, Sydney School of Public Health, Sydney Health Literacy Lab<br>Cvejic, Erin; The University of Sydney, Faculty of Medicine and Health, Sydney School of Public Health, Sydney Health Literacy Lab<br>Bonner, Carissa; The University of Sydney, Faculty of Medicine and Health, Sydney School of Public Health, Sydney Health Literacy Lab<br>Turner, Robin ; University of Otago, Division of Health Sciences, Biostatistics Unit<br>Walter, Stephen ; McMaster University , Faculty of Health Sciences, Department of Health Research Methods, Evidence and Impact<br>McCaffery, Kirsten; The University of Sydney, Faculty of Medicine and Health, Sydney School of Public Health, Sydney Health Literacy Lab |
| Keywords:                     | General diabetes < DIABETES & ENDOCRINOLOGY, PREVENTIVE MEDICINE, PUBLIC HEALTH                                                                                                                                                                                                                                                                                                                                                                                                                                                                                                                                                                                                                                                                                                        |
|                               |                                                                                                                                                                                                                                                                                                                                                                                                                                                                                                                                                                                                                                                                                                                                                                                        |

SCHOLARONE™  
Manuscripts

## ACCOUNTING FOR HEALTH LITERACY AND INTERVENTION PREFERENCES

1  
2  
3 Title

4  
5  
6 Accounting for health literacy and intervention preferences  
7  
8  
9  
10  
11 when reducing unhealthy snacking: Protocol for an online  
12  
13  
14  
15 randomized controlled trial  
16  
17  
18  
19

20 Julie Ayre<sup>1\*</sup>, Erin Cvejic<sup>2</sup>, Carissa Bonner<sup>1</sup>, Robin Turner<sup>3</sup>, Stephen Walter<sup>4</sup>, Kirsten McCaffery<sup>1</sup>  
21  
22

23 <sup>1</sup>The University of Sydney, Faculty of Medicine and Health, School of Public Health, Sydney Health  
24 Literacy Lab, NSW, Australia  
25  
26

27  
28 <sup>2</sup>The University of Sydney, Faculty of Medicine and Health, School of Public Health, NSW, Australia  
29  
30

31 <sup>3</sup>University of Otago, Division of Health Sciences, Biostatistics Unit  
32  
33

34 <sup>4</sup>McMaster University, Faculty of Health Sciences, Department of Health Research Methods,  
35 Evidence and Impact  
36  
37

38  
39 \* Corresponding author  
40  
41

42 E-mail: [julie.ayre@sydney.edu.au](mailto:julie.ayre@sydney.edu.au)  
43  
44  
45  
46  
47  
48  
49  
50  
51  
52  
53  
54  
55  
56  
57  
58  
59  
60

## ACCOUNTING FOR HEALTH LITERACY AND INTERVENTION PREFERENCES

## Abstract

### Introduction

Health literacy interventions are typically implemented using the ‘universal precautions approach’ in which all consumers are presented with simplified materials. Whilst this approach has shown to improve knowledge and comprehension, its impact on complex behaviours is less clear. Systematic reviews also suggest that health literacy interventions underutilise volitional strategies (such as planning and self-monitoring) that play an important role in behaviour change. Furthermore, a recent study found that volitional strategies may need to be tailored to the participant’s health literacy level. The current study aims to replicate these findings in a sample of people who have diabetes and/or are overweight or obese as measured by BMI, and to investigate the most effective method of allocating an action plan to a participant to reduce unhealthy snacking.

### Methods and analysis

We plan to recruit approximately 2,400 participants at baseline. Participants will receive one of two alternative online action plans intended to reduce unhealthy snacking (‘standard’ action plan or ‘literacy-sensitive’ action plan). Participants will be randomised to a method of allocation to an action plan: 1) random allocation; 2) allocation by health literacy screening tool; or 3) allocation by participant selection. Multiple linear regression will be used to evaluate the impact of health literacy on intervention effectiveness. The analysis will also identify the independent contributions of each of the action plans, method of allocation, health literacy, and participant selections on unhealthy snacking at 4-week follow-up.

### Ethics and dissemination

## ACCOUNTING FOR HEALTH LITERACY AND INTERVENTION PREFERENCES

This study was approved by the University of Sydney Human Research Ethics Committee [2017/793] and is registered with Australian New Zealand Clinical Trials Registry: ACTRN12618001409268p. Findings will be disseminated through peer-reviewed publications in international journals, conferences and updates with collaborating public health bodies (Diabetes NSW & ACT, and Western Sydney Local Health District).

## Article Summary

### Strengths and limitations of this study

- The impact of literacy-sensitive design on the effectiveness of an action plan intervention to reduce unhealthy snacking in a sample of people with diverse health literacy levels will be evaluated.
- The analysis will isolate the effects of each action plan intervention (standard and literacy-sensitive) from the effects of allocation method (random, screened or choice), the participant's health literacy (as categorised using the screening tool) and the effect of providing a choice of interventions.
- Free-text plans in this study will undergo content analysis to assess the quality of plans created by people with higher and lower health literacy.
- The impact of assessing participant preference prior to random allocation to an intervention on outcomes will also be explored.
- A subjective outcome measure (self-reported monthly unhealthy snacking collected at a single time-point) rather than an objective measure (e.g. unhealthy snacking observed throughout the month-long period) will be used, which may limit the study findings.

## ACCOUNTING FOR HEALTH LITERACY AND INTERVENTION PREFERENCES

## Introduction

Low health literacy is increasingly recognised as an important contributor to health inequality and is associated with increased hospitalization, mortality, prevalence of chronic disease and risk factors for health conditions (1). Current approaches to address health literacy issues have focused on providing all consumers, regardless of their health literacy level, with health information that is easy to process and understand (1, 2). Whilst this ‘universal precautions approach’ has been shown to improve health knowledge, it is less clear whether it is effective for improving complex behaviours such as healthy eating and increased physical activity (1, 3, 4). This may reflect the fact that health literacy guidelines and interventions place relatively little emphasis on strategies that promote action, such as planning, self-monitoring or problem solving (5-9). These kinds of strategies are increasingly recognised as key components of lifestyle interventions (10); furthermore, there has been little research investigating how they could be adapted for audiences with lower health literacy.

A recent randomized control trial (RCT) has investigated the effects of literacy-sensitive design on action plans to reduce unhealthy snacking behaviour (11). This design incorporated health literacy strategies (e.g. simple language) and separated the planning process into distinct steps to reduce cognitive demands. This ‘literacy-sensitive’ action plan was compared to action plan instructions that have been used in samples of the general population (12). The results from this study suggested that people with lower health literacy reported consuming fewer unhealthy snacks at follow-up when they had used the literacy-sensitive action plan, whereas people with higher health literacy reported consuming fewer unhealthy snacks using the ‘standard’ action plan (11).

The current study will build on these findings by evaluating the most effective way to determine the best action plan for participants. One obvious approach is to allocate an action

## ACCOUNTING FOR HEALTH LITERACY AND INTERVENTION PREFERENCES

1  
2  
3 plan based on a participant's health literacy score. Alternatively, participants could be asked  
4  
5 to select the plan they would prefer to follow. Although allowing the participant to choose  
6  
7 their plan might less accurately match a participant to an action plan that meets their health  
8  
9 literacy needs, there are some potential additional advantages to this approach. For example,  
10  
11 participants would be able to factor in other relevant aspects (such as engagement) (13), and  
12  
13 presenting participants with different options may also encourage greater satisfaction with  
14  
15 the intervention (14). This is further supported by evidence that the effects of interventions in  
16  
17 randomized controlled trials may be increased when participants receive their preferred  
18  
19 intervention (15).  
20  
21  
22

23  
24  
25 This study has three key aims. Firstly, this study aims to evaluate the impact of health literacy  
26  
27 and a literacy-sensitive action plan on unhealthy snacking in a sample of people with type 2  
28  
29 diabetes and/or overweight or obese BMI. In doing so this study aims to replicate previous  
30  
31 findings in a clinical sample (11).  
32  
33

34  
35 The second aim is to evaluate how the *method of allocation* to an action plan affects the  
36  
37 overall effectiveness of the intervention. Three methods of allocation will be evaluated: 1)  
38  
39 random allocation; 2) allocation based on individual health literacy; or 3) allowing  
40  
41 participants to choose. Furthermore, this study will employ a two-stage randomization  
42  
43 (Rucker) design (16) to identify the independent contributions of each of the action plans, the  
44  
45 method of allocation (effects of the screened and choice arms), health literacy, and action  
46  
47 plan selection.  
48  
49  
50

51  
52 The third aim is to evaluate whether assessment of participant preference for an intervention  
53  
54 prior to random allocation influences the effectiveness of the intervention.  
55  
56  
57

58 We hypothesise that:  
59  
60

## ACCOUNTING FOR HEALTH LITERACY AND INTERVENTION PREFERENCES

1  
2  
3 1. A literacy-sensitive action plan will be more effective at reducing unhealthy snacking for  
4 participants with lower health literacy, whereas the standard action plan will be more  
5  
6 effective for participants with higher health literacy.  
7  
8

9  
10  
11 2. The intervention will be more effective at reducing unhealthy snacking for participants  
12 who are allocated an action plan using the health literacy screening tool compared to those  
13 who are asked to select their preferred action plan. Both of these allocation methods will be  
14  
15 more effective than random allocation to an action plan.  
16  
17

18  
19  
20 3. Assessing preference will negatively impact plan effectiveness, an effect which will be  
21 greater for those who are randomised to the plan which is discordant with their preference.  
22  
23  
24  
25  
26  
27  
28

## 29 Methods and analysis

### 30 Study Design

31  
32 The design is a three parallel-arm online RCT to test the effect of health literacy, type of  
33 action plan, and method of allocation to an action plan on self-reported unhealthy snacking  
34 behaviour. The three methods of allocation are 1) random 2) use of a health literacy screening  
35 tool to allocate participants one of the two action plans ('screened' arm) and 3) participant  
36 choice of action plan ('choice' arm). This study will also evaluate whether the process of  
37 assessing preference for a particular action plan prior to randomisation will have an impact on  
38 subsequent self-reported snacking behaviour. A schematic representation of the study design  
39 is shown in Figure 1.  
40  
41  
42  
43  
44  
45  
46  
47  
48  
49  
50  
51

### 52 Participants and recruitment

53  
54 The proposed study will seek to recruit 2,352 Australian participants with type 2 diabetes.  
55  
56 Participants will be recruited through an online market research company, Research Now  
57  
58  
59  
60



## ACCOUNTING FOR HEALTH LITERACY AND INTERVENTION PREFERENCES

1  
2  
3 Survey Sampling International (RN SSI), which has a pool of approximately 10,000  
4  
5 Australians with type 2 diabetes. This sample will be supplemented with additional  
6  
7 participants from RN SSI who have self-reported height and weight corresponding to an  
8  
9 overweight or obese BMI (i.e.,  $BMI \geq 25 \text{ kg/m}^2$ ). Participants will be eligible to participate if  
10  
11 they are registered with RN SSI's Australian registry, are over 18 years of age (adult  
12  
13 population), and self-report that they have type 2 diabetes or self-report a height and weight  
14  
15 that correspond to overweight or obese BMI. Participants will be excluded if they do not  
16  
17 speak English. Participants will not be excluded on the basis of their snacking behaviour.  
18  
19  
20  
21

22  
23 Participants who click the link received from RN SSI will be presented with a brief  
24  
25 introduction to the study and a link to the Participant Information Sheet. Informed consent  
26  
27 will be indicated by completion of the online survey, as outlined in the Participant  
28  
29 Information Sheet. On the next page, participants then begin the baseline survey.  
30  
31

### 32 33 Patient and public involvement

34  
35 Patients and public were not directly involved in development of the research question,  
36  
37 however, consumer health representatives living with type 2 diabetes were consulted for  
38  
39 feedback at multiple stages of intervention and study development, including: intervention  
40  
41 instructions, the appropriateness of the literacy sensitive plans, and the ease with which  
42  
43 feedback at follow-up could be communicated. Participants in the trial are able to indicate if  
44  
45 they are interested in receiving a lay summary of the study results which will be disseminated  
46  
47 through email by RN SSI (further maintaining participants anonymity). We will also assess  
48  
49 participant burden and acceptability using the pilot data. Lastly, participants will be able to  
50  
51 provide feedback on the perceived burden of the intervention using free text fields during the  
52  
53 follow-up survey.  
54  
55  
56  
57  
58  
59  
60

## ACCOUNTING FOR HEALTH LITERACY AND INTERVENTION PREFERENCES

### Participant allocation

After completing baseline measures participants will be automatically randomised to one of three allocation methods using the ‘Survey Flow’ and ‘Randomiser’ functions included in the survey platform (Qualtrics) (Figure 1). The ‘Randomiser’ is based on the Mersenne Twister, a pseudorandom number generator. This allocation method will determine how the planning tool (either literacy-sensitive or standard) is assigned to the participant. Participants in the random arm will be unaware of their allocation method. At baseline, only the participants in the choice arm and those who are randomised to assess prior preference in the random arm will be aware of the two different tool versions. Participants in the screened arm will be aware that there is more than one tool available.

ACCOUNTING FOR HEALTH LITERACY AND INTERVENTION PREFERENCES

[Figure 1 here]

**Figure 1: Anticipated participant recruitment and attrition to achieve sufficient sample size**

For peer review only

1  
2  
3  
4  
5  
6  
7  
8  
9  
10  
11  
12  
13  
14  
15  
16  
17  
18  
19  
20  
21  
22  
23  
24  
25  
26  
27  
28  
29  
30  
31  
32  
33  
34  
35  
36  
37  
38  
39  
40  
41  
42  
43  
44  
45  
46

## ACCOUNTING FOR HEALTH LITERACY AND INTERVENTION PREFERENCES

*Allocation method*

1. **Random (Arm A):** Participants randomised to the ‘random’ arm will be further randomised to either 1) assess their prior preferences (i.e. their preferred action plan; Arm A1), and then randomised to the standard or literacy-sensitive action plan; or 2) randomised to the standard or literacy-sensitive action plan without assessment of prior preferences (Arm A2; Figure 1). Prior preference will be measured using the same format as in the ‘participant choice’ arm (Arm C) with additional text stating that participants may not receive their preferred tool.
2. **Screened (Arm B):** Allocation is based on assessment of health literacy using the Newest Vital Sign (NVS) measure. The literacy-sensitive action plan will be allocated to those scoring less than 4 (indicative of inadequate health literacy), and the standard action plan will be allocated to the remaining participants. Participants will be told that, based on their responses, the researchers have selected an action plan tool that is most suitable for them.
3. **Choice (Arm C):** Participants will be provided with a brief description of the action plans and select the plan they want to use. Order of presentation of the two plans is randomised. In the first instance, participants have the option of selecting ‘Unsure’ to allow for undecided participants. Participants will then be presented with an alternative description of the study and asked again to make a choice. Participants will be informed that if they select ‘Unsure’ again, the researchers will select a plan for them. In doing so, participants will be randomised to an action plan as per Rucker protocol (16).

*Action plan interventions*

Either a literacy-sensitive or standard action plan will be allocated to participants. The text used in each tool is presented below:

## ACCOUNTING FOR HEALTH LITERACY AND INTERVENTION PREFERENCES

**Literacy-sensitive action plan (“Smart Snacking 101 (basic)”):** This consists of 4 steps that guide the participant through the process of developing an appropriate plan (also shown in Figure 2):

1. Step 1: Sometimes we snack because we are hungry, but there are lots of other reasons. Think about your snacks in the last week. Below is a list of ‘snack moments.’ These are times when people tend to choose unhealthy snacks or eat too much. Choose 3 snack moments from the list that happened to you the most often in the last week. [Participants selects from list of snack moments].
2. Step 2: Below are your top 3 snack moments. Some snack moments will be more important than others. Choose the 1 that you would be happiest to change. [Participant chooses from 3 previously selected snack moments]
3. Step 3: Great! Your most important snack moment was snacking because you are [example snack moment: bored]. The last step is to come up with a plan! Choose the solution that you think will work best for you. Drag it into the space on the right. [Participants selects from list of solutions]
4. Step 4: Imagine how your plan might feel. [examples of scenarios when this might happen]. The final step is to make sure the plan is realistic. How hard do you think it will be to do this plan for the next month [Slider options range from very easy (1) to very hard (10). If the participant selects a number greater than or equal to 7 they will be prompted to revise the plan]

[Figure 2 here]

**Figure 2: Mobile screenshots from *literacy-sensitive action plan*. From left to right: a) Step 1: Selecting top 3 snacking scenarios; b) Step 2: Selecting 1 key scenario; c) Step 3: Selecting a solution; d) Step 4: Imagining the plan**

## ACCOUNTING FOR HEALTH LITERACY AND INTERVENTION PREFERENCES

1  
2  
3  
4  
5  
6  
7 **Standard action plan (“Smart Snacking Pro (advanced)”):** Participants receive the  
8  
9 following instructions: “We want you to plan how you will change your unhealthy snacking  
10  
11 behaviour each day, because forming plans has been shown to improve snacking habits. You  
12  
13 are free to choose how you do this but we want you to formulate your plans in as much detail  
14  
15 as possible. Pay attention to the situations in which you will implement (carry out) these  
16  
17 plans. Focus on situations when you are not hungry but find yourself snacking. Please enter  
18  
19 your situations and your plans below.”  
20  
21

22  
23  
24 After completing either action plan participants will be presented with their plan for a final  
25  
26 time and instructed to write down, take a screenshot or make a copy of it. Participants will  
27  
28 also be asked to confirm that they have a copy of the plan.  
29  
30

### 31 32 *Baseline and follow-up surveys*

33  
34 At baseline participants will complete demographic questions and measures of health literacy.  
35  
36 They will then receive information about general reasons for reducing unhealthy snacking  
37  
38 and a definition of unhealthy snacks. Participants then complete measures of snacking  
39  
40 behaviour, habit strength (concerning consumption of unhealthy snacks), and intentions to  
41  
42 reduce unhealthy snacking. Intention to reduce unhealthy snacking will be measured again,  
43  
44 immediately after creating the plan. Participants will be emailed a reminder of their personal  
45  
46 plan at baseline (within the first week), and before then end of the 2nd and 3rd weeks to  
47  
48 increase compliance and retention. Participants will complete a follow-up survey after 4  
49  
50 weeks. The follow-up survey consists of the same description of reasons to reduce unhealthy  
51  
52 snacking and definition, followed by measures of snacking behaviour, habit strength and  
53  
54 intention. Action control will also be measured in the follow-up survey.  
55  
56  
57  
58  
59  
60

## ACCOUNTING FOR HEALTH LITERACY AND INTERVENTION PREFERENCES

## Measures

*Screening measures*

Prior to beginning the survey, participants will be asked to indicate whether they have type 2 diabetes, and to provide their height (cm or feet and inches) and weight (kg).

*Demographic measures*

Participants will be asked to complete questions about their age, employment status, highest level of educational attainment, and, if they report having diabetes, years since diagnosis and whether or not they use insulin.

*Health literacy*

Health literacy will be measured using the Newest Vital Sign (NVS)(17), a 6-item measure of functional health literacy, and a single-item literacy screener (18). NVS scores of 0-1 indicate a high likelihood of limited healthy literacy, scores of 2-3 indicate the possibility of limited health literacy and scores of 4-6 indicate adequate health literacy.

*Need for cognition*

Three items on a 7-point likert scale (strongly disagree to strongly agree) will assess the participant's need for cognition (19).

*Snack scores (previous month)*

Snacking scores will be measured using a validated 7-item measure based on a diet score developed by the Commonwealth Scientific and Industrial Research Organisation (CSIRO) (20). Items are drawn from the 'discretionary foods' category which the Australian Guidelines to Healthy Eating define as foods 'not considered necessary for a healthy diet'. Alcohol and sugar sweetened beverages are excluded from the assessment in this study as the focus is on 'snacks.' Participants answer how many serves of unhealthy snacks they ate in the past month. Participants can answer according to the number of serves per day, week or month. Average weekly serves of unhealthy snacks will be calculated from these scores.

## ACCOUNTING FOR HEALTH LITERACY AND INTERVENTION PREFERENCES

*Perceived unhealthy/healthy snacking (previous week)*

Two items, each on a 7-point Likert scale will assess perceived extent of healthy and unhealthy snacking in the previous week, respectively.

*Snacks consumed (previous day)*

Participants will be asked to select from among 26 items the snacks that they had consumed in the previous day. This list includes unhealthy and healthy snacks and is based on previous work (21).

*Intention, habit strength and action control*

The measure of intention consists of 3 items that ask about the participant's intention to reduce unhealthy snacking (22, 23). Habit strength will be assessed using the 12-item self-report habit strength index (24), and action control will be assessed using a 6-item measure (25). Responses to each item are recorded on 7-point Likert scales (strongly disagree to strongly agree).

*Difficulty using the planning tool*

A single item will ask participants to rate how hard it was to use the planning tool (1=not at all hard, 5=extremely hard).

*Preferred action plan at follow-up*

At follow-up, participants will be reminded of the name and logo used for their plan. Participants will be shown an image slider that contains screenshots from the other action plan. Participants will then be asked: "If you were given the choice, which action plan would you prefer to use next time?"

*Sample size*

The proposed study will seek to analyse a sample of 2,000 Australian participants at follow-up with high BMI (overweight/obese) and/or type 2 diabetes. At baseline participants will be



## ACCOUNTING FOR HEALTH LITERACY AND INTERVENTION PREFERENCES

1  
2  
3 randomised at a ratio of 2:1:1 to each allocation method arm, such that there are a total of  
4  
5 1,000 participants in the random arm (who will then be evenly randomised to assess or not  
6  
7 assess their preference for a particular action plan before they are ultimately randomised to an  
8  
9 action plan), and 500 in the two remaining allocation method arms (the screened and choice  
10  
11 arms). With a two sided alpha of 0.05 and power of 80%, a sample of this size will allow us  
12  
13 to detect a small main effect of  $f = 0.08$  in a univariate ANOVA comparing the three  
14  
15 allocation method arms and in a univariate ANOVA comparing the two prior-preference  
16  
17 assessment arms; this corresponds to a minimum pairwise difference between the two most  
18  
19 extreme mean values of approximately 0.18 standard deviations.  
20  
21  
22  
23  
24

25 Based on our previous studies recruiting through this provider, we anticipate an attrition rate  
26  
27 no greater than 15% by one month follow-up. Therefore, we estimate a total of 2, 352 should  
28  
29 be recruited at baseline to ensure sufficient sample size for analysis.  
30  
31  
32

33 A sample of this size will also ensure that there is at least 80% power for secondary analysis  
34  
35 conducted to estimate treatment and preference effects (16, 26) with a treatment effect  
36  
37 between the two interventions (literacy-sensitive and standard planning tools) as small as  
38  
39 0.25 standard deviations (estimated as 5 snacks per month based on previous findings (11)),  
40  
41 and a preference effect, comparing those who received their preferred tool to those who did  
42  
43 not, as small as 0.35 standard deviations (approximately 7 snacks per month). This assumes  
44  
45 that approximately equal proportions of participants will choose the literacy-sensitive and  
46  
47 standard planning tools in the choice arm, and that there will be approximately equal  
48  
49 proportions of participants allocated to each of these interventions in the screened arm.  
50  
51  
52  
53  
54

### Piloting

55  
56  
57 The intervention will be piloted with 200 participants to check that approximately equal  
58  
59 numbers of participants allocated to the choice condition select each of the interventions. If  
60

## ACCOUNTING FOR HEALTH LITERACY AND INTERVENTION PREFERENCES

required, sample size estimates will be adjusted to ensure that the study is sufficiently powered. Piloting will also allow us to assess participant burden and intervention acceptability.

### Analysis:

Only participants who have completed follow-up will be included for analyses of outcome variables. Baseline characteristics of completers and non-completers will be compared to assess bias and generalisability.

### *Confirmatory analysis*

A confirmatory analysis will replicate the analysis previously reported (11) to examine if the treatment effect is modified by health literacy. Multiple linear regression models including an intervention group  $\times$  health literacy (NVS score) interaction term will be used to predict follow-up snacking scores and perceived difficulty using the plan. Important correlates of health literacy (age, level of education, language spoken at home)(1), diabetes status and baseline snacking will be controlled for in the model. NVS scores will be examined both continuously and categorically (i.e., inadequate vs. adequate health literacy).

### *Assessment of prior preference analysis*

For participants in the random arm of the study, participants whose action plan preference was assessed prior to randomisation to an intervention will be compared to those whose preference was not assessed. Multiple linear regression (controlling for health literacy, age, level of education, language spoken at home and baseline snacking) will evaluate the effect of preference assessment on unhealthy snacking behaviour. For participants who provided a preference, an additional multiple linear regression will evaluate the effect of participants receiving their preferred intervention compared to those not receiving their preferred intervention on unhealthy snacking behaviour.

## ACCOUNTING FOR HEALTH LITERACY AND INTERVENTION PREFERENCES

*Analysis of effects of allocation method*

The primary analysis will use regression to test for a difference in self-reported unhealthy snacking between the three randomised arms (random, screened, and choice) whilst adjusting for any effect of diabetes status. An adjusted model will also be constructed to allow for any baseline imbalances in the potential confounders including age, English as a second language, level of education. The analysis will be repeated on the secondary outcomes of perceived unhealthy snacking in the previous week, snacks consumed the previous day, difficulty using the planning tool, action control, and habit strength with similar adjustment for diabetes status and any baseline imbalances. A sub-analysis will also be conducted on participants with and without type 2 diabetes.

Treatment, preference and selection effects will be estimated for the primary outcome (16).

The treatment effect compares the efficacy of the health literate action plan with the standard action plan in the random arm. The preference effect and selection effects are estimated using the random and choice arms. The preference effect measures the difference in self-reported unhealthy snacking for those who received their preferred action plan compared to those who did not receive their preferred action plan. The selection effect measures the difference between those who would select the literacy-sensitive intervention with those who would select the standard intervention regardless of which intervention they received. Secondary analyses will adjust for diabetes status, and baseline imbalances in potential confounders including age, English as a second language, level of education. Data from participants in the screened arm will also be analysed in this manner, producing estimates analogous to the preference and selection effects.

## ACCOUNTING FOR HEALTH LITERACY AND INTERVENTION PREFERENCES

1  
2  
3 These effects will also be estimated for the secondary outcomes of perceived unhealthy  
4 snacking in the previous week, snacks consumed the previous day, difficulty using the  
5 planning tool, action control, and habit strength with similar adjustment for diabetes status  
6 and any baseline imbalances.  
7  
8  
9  
10  
11  
12

13 Bootstrapping, by taking repeated random samples with replacement, will be used to estimate  
14 the difference between the preference effect (estimated using choice arm) and an analogous  
15 effect estimated using the screened arm, as well as the difference between the selection effect  
16 (estimated using the choice arm) and an analogous effect estimated using the screened arm.  
17  
18  
19  
20  
21  
22

23 Bootstrapping will also be used to estimate the confidence intervals for non-continuous  
24 outcome measures. The bootstrapping is necessary, as the variances for the estimated  
25 differences and non-continuous outcomes have not been derived previously (27).  
26  
27  
28  
29  
30

### 31 *Additional analysis*

32  
33 Two researchers will also independently code standard action plans to indicate the extent that  
34 participants followed standard action plan instructions (that is, provided at least one  
35 ‘situation’, and one ‘plan’) and the extent that plans differed from the pre-determined options  
36 presented in the literacy-sensitive action plans (for example, situations or solutions that did  
37 not correspond to options listed in the literacy-sensitive action plan, or strategies that fell  
38 outside of the “If-then” construction. The latter may include, for example, making sure  
39 healthy snacks are prepared in advance, or refraining from buying certain foods at the  
40 supermarket). Coders will be blind to the health literacy level of participants. Any  
41 disagreements will be systematically resolved through discussion.  
42  
43  
44  
45  
46  
47  
48  
49  
50  
51  
52  
53

### 54 *Data management*

55  
56 De-identified data will be captured electronically on the secure Qualtrics server. Data will be  
57 stored securely in de-identified form, with a unique participant ID to link responses from the  
58  
59  
60

## ACCOUNTING FOR HEALTH LITERACY AND INTERVENTION PREFERENCES

1  
2  
3 baseline and follow-up surveys. In all forms of dissemination, only de-identified data will be  
4  
5 presented as group means and differences to maintain the anonymity of participants. In line  
6  
7 with National Health and Medical Research Council (NHMRC) recommendations, and  
8  
9 University of Sydney policies, all data will be kept for a minimum 5 years  
10  
11  
12

### 13 Ethics and dissemination

14  
15 This study was approved by the University of Sydney Human Research Ethics Committee  
16  
17 [2017/793]. The interventions used in this study are practical; they can be easily incorporated  
18  
19 into existing self-management practices, particularly with the use of online technologies, and  
20  
21 are low in cost. Ascertaining an effective way to tailor planning tools to health literacy level  
22  
23 (that is, allowing the participant to choose by employing a screening tool) will provide  
24  
25 valuable information for implementation in apps that target people with varying health  
26  
27 literacy levels. Findings from this study will be disseminated through peer-reviewed  
28  
29 publication and national and international conference presentations. Findings will also be  
30  
31 disseminated through community and research partnerships with groups such as Western  
32  
33 Sydney Diabetes.  
34  
35  
36  
37  
38  
39  
40  
41  
42  
43  
44  
45  
46  
47  
48  
49  
50  
51  
52  
53  
54  
55  
56  
57  
58  
59  
60

## ACCOUNTING FOR HEALTH LITERACY AND INTERVENTION PREFERENCES

## Full references

1. Berkman ND, Sheridan SL, Donahue KE, Halpern DJ, Viera AJ, Crotty K, et al. Health literacy interventions and outcomes: An updated systematic review. Evidence report/technology assessment. 2011(199):1-941.
2. Meppelink CS, Smit EG, Diviani N, Van Weert JCM. Health Literacy and Online Health Information Processing: Unraveling the Underlying Mechanisms. *Journal of Health Communication*. 2016;21(sup2):109-20.
3. Sheridan SL, Halpern DJ, Viera AJ, Berkman ND, Donahue KE, Crotty K. Interventions for Individuals with Low Health Literacy: A Systematic Review. *Journal of Health Communication*. 2011;16(sup3):30-54.
4. Bailey SC, Brega AG, Crutchfield TM, Elasy T, Herr H, Kaphingst K, et al. Update on health literacy and diabetes. *Diabetes Educ*. 2014;40(5):581-604.
5. Schwarzer R. Modeling Health Behavior Change: How to Predict and Modify the Adoption and Maintenance of Health Behaviors. *Applied Psychology*. 2008;57(1):1-29.
6. Hagger MS, Chatzisarantis NLD. An Integrated Behavior Change Model for Physical Activity. *Exercise and Sport Sciences Reviews*. 2014;42(2):62-9.
7. Brega A, Barnard J, Mabachi N, Weiss B, DeWalt D, Brach C, et al. AHRQ Health Literacy Universal Precautions Toolkit, 2nd Edition Rockville, MD: Agency for Healthcare Research and Quality; 2015 [updated February 2015. Available from: <http://www.ahrq.gov/professionals/quality-patient-safety/quality-resources/tools/literacy-toolkit/healthlittoolkit2.html>.
8. Kim SH, Lee A. Health-Literacy-Sensitive Diabetes Self-Management Interventions: A Systematic Review and Meta-Analysis. *Worldviews on Evidence-Based Nursing*. 2016;13(4):324-33.

## ACCOUNTING FOR HEALTH LITERACY AND INTERVENTION PREFERENCES

- 1  
2  
3 9. Schaffler J, Leung K, Tremblay S, Merdsoy L, Belzile E, Lambrou A, et al. The  
4  
5 Effectiveness of Self-Management Interventions for Individuals with Low Health Literacy  
6  
7 and/or Low Income: A Descriptive Systematic Review. *Journal of General Internal Medicine*.  
8  
9 2018.
- 10  
11  
12 10. Michie S, Abraham C, Whittington C, McAteer J, Gupta S. Effective techniques in  
13  
14 healthy eating and physical activity interventions: a meta-regression. *Health Psychology*.  
15  
16 2009;28(6):690.
- 17  
18  
19 11. Ayre J, Bonner C, Cvejic E, McCaffery K. Randomized trial of planning tools to  
20  
21 reduce unhealthy snacking: implications for health literacy. *PloS one*. forthcoming.
- 22  
23  
24 12. Armitage CJ. Field experiment of a very brief worksite intervention to improve  
25  
26 nutrition among health care workers. *Journal of Behavioral Medicine*. 2015;38(4):599-608.
- 27  
28  
29 13. Smith SG, Curtis LM, Wardle J, von Wagner C, Wolf MS. Skill Set or Mind Set?  
30  
31 Associations between Health Literacy, Patient Activation and Health. *PLOS ONE*.  
32  
33 2013;8(9):e74373.
- 34  
35  
36 14. Nguyen MH, Smets EMA, Bol N, Loos EF, Van Weert JCM. How Tailoring the  
37  
38 Mode of Information Presentation Influences Younger and Older Adults' Satisfaction with  
39  
40 Health Websites. *Journal of Health Communication*. 2018:1-11.
- 41  
42  
43 15. Preference Collaborative Review Group. Patients' preferences within randomised  
44  
45 trials: systematic review and patient level meta-analysis. *BMJ*. 2008;337.
- 46  
47  
48 16. Rücker G. A two-stage trial design for testing treatment, self-selection and treatment  
49  
50 preference effects. *Statistics in Medicine*. 1989;8(4):477-85.
- 51  
52  
53 17. Weiss BD, Mays MZ, Martz W, Castro KM, DeWalt DA, Pignone MP, et al. Quick  
54  
55 assessment of literacy in primary care: the newest vital sign. *Ann Fam Med*. 2005;3(6):514-  
56  
57 22.
- 58  
59  
60

## ACCOUNTING FOR HEALTH LITERACY AND INTERVENTION PREFERENCES

- 1  
2  
3 18. Wallace LS, Rogers ES, Roskos SE, Holiday DB, Weiss BD. BRIEF REPORT:  
4 Screening Items to Identify Patients with Limited Health Literacy Skills. *Journal of General*  
5  
6 *Internal Medicine*. 2006;21(8):874-7.  
7  
8  
9  
10 19. Nikoloudakis IA, Crutzen R, Rebar AL, Vandelanotte C, Quester P, Dry M, et al. Can  
11 you elaborate on that? Addressing participants' need for cognition in computer-tailored  
12 health behavior interventions. *Health Psychology Review*. 2018:1-16.  
13  
14  
15 20. Hendrie G, Baird D, Golley R, Noakes M. The CSIRO Healthy Diet Score: An Online  
16 Survey to Estimate Compliance with the Australian Dietary Guidelines. *Nutrients*.  
17 2017;9(1):47.  
18  
19  
20  
21 21. Verhoeven AAC, Adriaanse MA, Evers C, de Ridder DTD. The power of habits:  
22 Unhealthy snacking behaviour is primarily predicted by habit strength. *British Journal of*  
23 *Health Psychology*. 2012;17(4):758-70.  
24  
25  
26 22. Verhoeven AAC, Adriaanse MA, de Ridder DTD, de Vet E, Fennis BM. Less is  
27 more: The effect of multiple implementation intentions targeting unhealthy snacking habits.  
28 *European Journal of Social Psychology*. 2013;43(5):344-54.  
29  
30  
31 23. Verhoeven AAC, Adriaanse MA, de Vet E, Fennis BM, de Ridder DTD. Identifying  
32 the 'if' for 'if-then' plans: Combining implementation intentions with cue-monitoring  
33 targeting unhealthy snacking behaviour. *Psychology & Health*. 2014;29(12):1476-92.  
34  
35  
36 24. Verplanken B, Orbell S. Reflections on Past Behavior: A Self-Report Index of Habit  
37 Strength. *Journal of Applied Social Psychology*. 2003;33(6):1313-30.  
38  
39  
40 25. Sniehotta FF, Scholz U, Schwarzer R. Bridging the intention-behaviour gap:  
41 Planning, self-efficacy, and action control in the adoption and maintenance of physical  
42 exercise. *Psychology & Health*. 2005;20(2):143-60.  
43  
44  
45  
46  
47  
48  
49  
50  
51  
52  
53  
54  
55  
56  
57  
58  
59  
60



## ACCOUNTING FOR HEALTH LITERACY AND INTERVENTION PREFERENCES

- 1  
2  
3 26. Turner RM, Walter SD, Macaskill P, McCaffery KJ, Irwig L. Sample Size and Power  
4  
5 When Designing a Randomized Trial for the Estimation of Treatment, Selection, and  
6  
7 Preference Effects. *Medical Decision Making*. 2014;34(6):711-9.  
8  
9  
10 27. Cameron B, Peduzzi P, Esserman D. Extensions to the two-stage randomized trial  
11  
12 design for testing treatment, self-selection, and treatment preference effects to binary  
13  
14 outcomes. *Statistics in Medicine*. 2018;37(22):3147-78.  
15  
16  
17  
18  
19  
20  
21  
22  
23  
24  
25  
26  
27  
28  
29  
30  
31  
32  
33  
34  
35  
36  
37  
38  
39  
40  
41  
42  
43  
44  
45  
46  
47  
48  
49  
50  
51  
52  
53  
54  
55  
56  
57  
58  
59  
60

For peer review only

## ACCOUNTING FOR HEALTH LITERACY AND INTERVENTION PREFERENCES

### Authors' contributions

Conceptualisation, methodology, writing – review and editing: JA, CB, EC, RT, SW, KM

Investigation, project administration: JA

Writing – original draft preparation: JA, EC, RT

Software: RT

Supervision: EC, CB, KM

Funding acquisition: CB, JA, RT, KM

### Funding statement

This work was supported by Diabetes Australia, grant number G199678.

### Competing interests statement

Authors have no competing interests.

### Acknowledgements

We would like to thank our type 2 diabetes consumer health representatives Edward Hartley and Mike Font for their feedback and input into the design of this study. We would also like to acknowledge the CSIRO for their permission to use items from the discretionary foods components of the CSIRO diet score.

1  
2  
3  
4  
5  
6  
7  
8  
9  
10  
11  
12  
13  
14  
15  
16  
17  
18  
19  
20  
21  
22  
23  
24  
25  
26  
27  
28  
29  
30  
31  
32  
33  
34  
35  
36  
37  
38  
39  
40  
41  
42  
43  
44  
45  
46  
47  
48  
49  
50  
51  
52  
53  
54  
55  
56  
57  
58  
59  
60

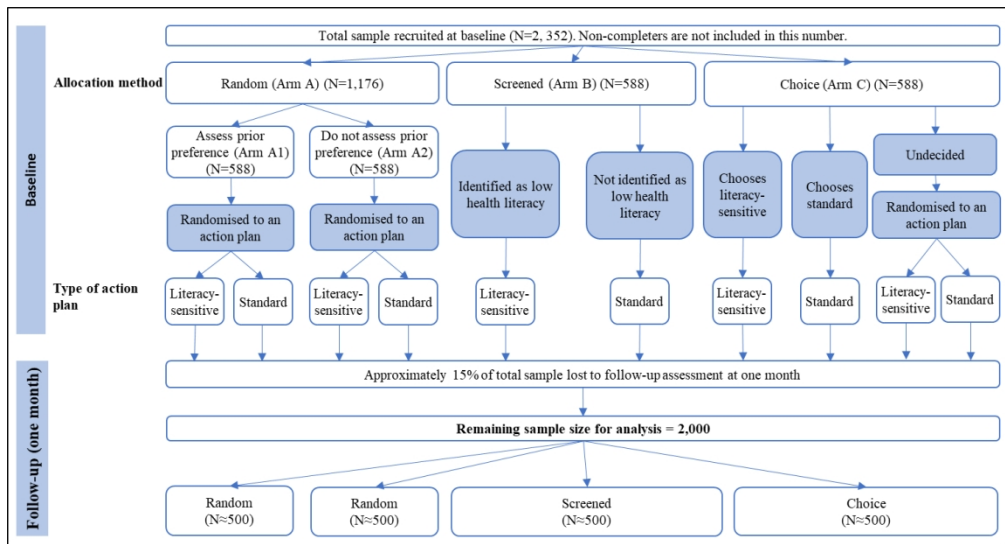

Figure 1: Anticipated participant recruitment and attrition to achieve sufficient sample size

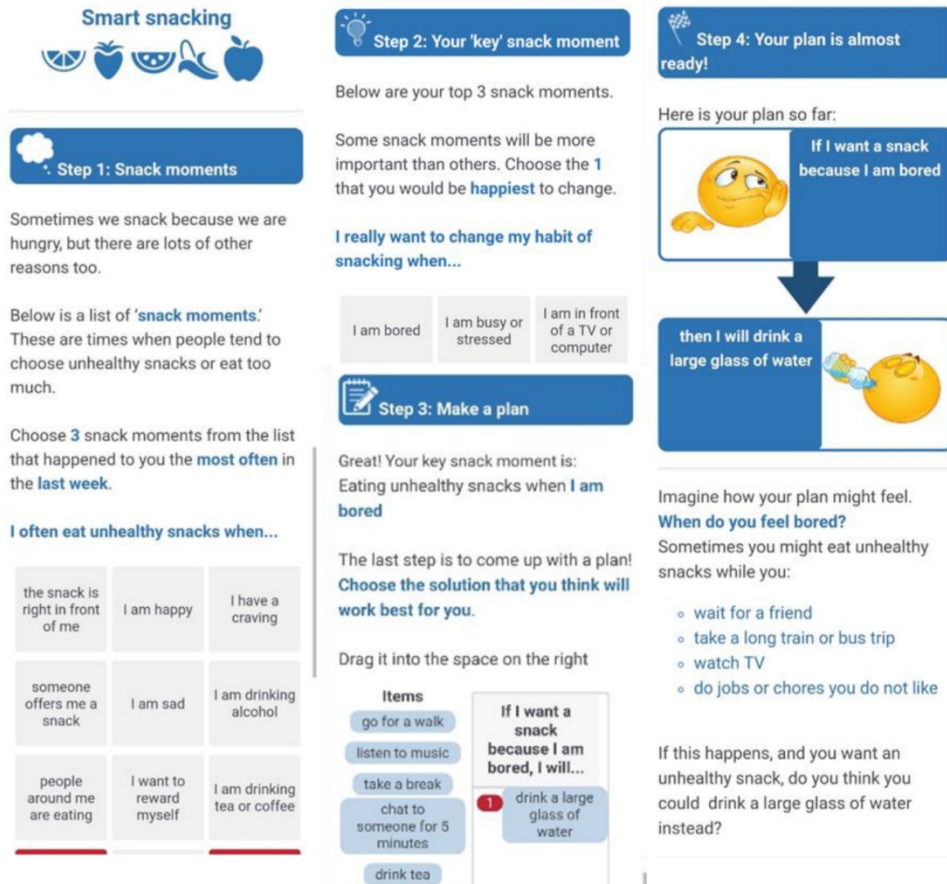

Figure 2: Mobile screenshots from literacy-sensitive action plan. From left to right: a) Step 1: Selecting top 3 snacking scenarios; b) Step 2: Selecting 1 key scenario; c) Step 3: Selecting a solution; d) Step 4: Imagining the plan

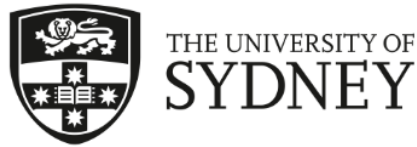

## Study Information Sheet: Smart snacking: An online planning tool

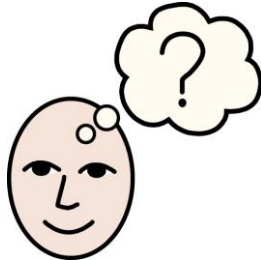

### What is the study about?

We are doing a research study to find out more about tools to help people eat less unhealthy snacks. While many of us want to change the way we snack, this can be very hard. Often we make plans but have trouble sticking to them over long periods of time. This study will look at online tools that help people stick to their plans.

### Who is carrying out the study?

We are from the School of Public Health at the University of Sydney. Our names are:

- Julie Ayre
- Carissa Bonner
- Robin Turner
- Erin Cvejic
- Kirsten McCaffery
- Stephen Walter

### What will happen if I say that I want to be in the study?

You can decide if you want to take part in the study or not. Please read this sheet carefully so that you can make up your mind about whether you want to take part. Completing a question in the online survey is an indication of your consent to take part in the study.

You may stop completing the online survey at any point if you do not wish to continue, and we will not use your answers. You do not have to give a reason for not taking part. Once you have submitted your survey anonymously, your responses cannot be withdrawn.

If you decide that you want to be in our study, we will ask you to:

1. Complete questions online (for example, about the foods you eat and snacking habits)
2. Use the online planning tool to create a plan to help you eat less unhealthy snacks. We will ask you to follow the plan for 4 weeks. You will receive 3 reminder messages about your plan during that time.
3. Complete questions online about your snacking behaviour and your plan after 4 weeks.

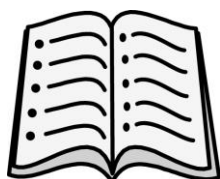

### Will anyone else know what I say in the study?

All of the information that we have about you from the study will be confidential. It will be stored in a safe place at the University of Sydney.

We will write a report about the study and show it to other people but no one will know that you were in the study.

### How long will the study take?

- The **first part** of the study will take about **20 minutes**.
- You will be asked to **try out your snacking plan** for **4 weeks**.
- The **second part** of the study (after 4 weeks) will take about **10 minutes**.

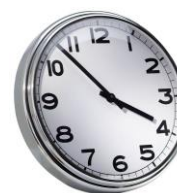

### Are there any good things about being in the study?

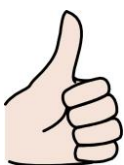

This study may help you think more about the way that you snack. This is the first step to changing your eating patterns.

### Are there any bad things about being in the study?

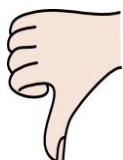

This study will take up some of your time, but we don't think it will be bad for you or cost you anything.

By giving your consent to take part in this study you are telling us that you:

- ✓ Understand what you have read.
- ✓ Agree to take part in the research study as described above.
- ✓ Agree to the use of your personal information for the research purposes described above.

### What if I want more information about the study or my involvement in it?

You can contact the researcher Julie Ayre:

- **Call:** (02) 9351 7789
- **Email:** [julie.ayre@sydney.edu.au](mailto:julie.ayre@sydney.edu.au).

### What if I am not happy with the study or the people doing the study?

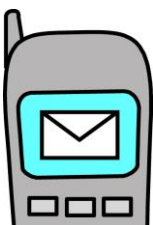

The ethical aspects of this study have been approved by the HREC of the University of Sydney [Project Number 2018/793].

If you are not happy with how we are doing the study or how we treat you, then you can:

- **Call** the university on +61 2 8627 8176 or
- Write an **email** to [human.ethics@sydney.edu.au](mailto:human.ethics@sydney.edu.au)

**SPIRIT 2013 Checklist: Recommended items to address in a clinical trial protocol and related documents\***

| Section / Item                    | Item Number | Description                                                                                                                                                                                                                                                                              |                              |
|-----------------------------------|-------------|------------------------------------------------------------------------------------------------------------------------------------------------------------------------------------------------------------------------------------------------------------------------------------------|------------------------------|
| <b>Administrative information</b> |             |                                                                                                                                                                                                                                                                                          |                              |
| Title                             | 1           | Descriptive title identifying the study design, population, interventions, and, if applicable, trial acronym                                                                                                                                                                             | 1                            |
| Trial registration                | 2a          | Trial identifier and registry name. If not yet registered, name of intended registry                                                                                                                                                                                                     | 3                            |
|                                   | 2b          | All items from the World Health Organization Trial Registration Data Set                                                                                                                                                                                                                 | 3<br>(available from ANZCTR) |
| Protocol version                  | 3           | Date and version identifier                                                                                                                                                                                                                                                              | 3 (As shown in ANZCTR)       |
| Funding                           | 4           | Sources and types of financial, material, and other support                                                                                                                                                                                                                              | 24                           |
| Roles and responsibilities        | 5a          | Names, affiliations, and roles of protocol contributors                                                                                                                                                                                                                                  | Role 24                      |
|                                   | 5b          | Name and contact information for the trial sponsor                                                                                                                                                                                                                                       | 1                            |
|                                   | 5c          | Role of study sponsor and funders, if any, in study design; collection, management, analysis, and interpretation of data; writing of the report; and the decision to submit the report for publication, including whether they will have ultimate authority over any of these activities | 24                           |
|                                   | 5d          | Composition, roles, and responsibilities of the coordinating centre, steering committee, endpoint adjudication committee, data management team, and other individuals or groups overseeing the trial, if applicable (see Item 21a for data monitoring committee)                         | N/A                          |
| <b>Introduction</b>               |             |                                                                                                                                                                                                                                                                                          |                              |
| Background and rationale          | 6a          | Description of research question and justification for undertaking the trial, including summary of relevant studies (published and unpublished) examining benefits and harms for each intervention                                                                                       | 4-6                          |
|                                   | 6b          | Explanation for choice of comparators                                                                                                                                                                                                                                                    | 4-5                          |

|              |   |                                                                                                                                                                                                           |     |
|--------------|---|-----------------------------------------------------------------------------------------------------------------------------------------------------------------------------------------------------------|-----|
| Objectives   | 7 | Specific objectives or hypotheses                                                                                                                                                                         | 5-6 |
| Trial design | 8 | Description of trial design including type of trial (eg, parallel group, crossover, factorial, single group), allocation ratio, and framework (eg, superiority, equivalence, noninferiority, exploratory) | 6   |

For peer review only



| <b>Methods: Participants, interventions, and outcomes</b> |     |                                                                                                                                                                                                                                                                                                                                                                                |                       |
|-----------------------------------------------------------|-----|--------------------------------------------------------------------------------------------------------------------------------------------------------------------------------------------------------------------------------------------------------------------------------------------------------------------------------------------------------------------------------|-----------------------|
| Study setting                                             | 9   | Description of study settings (eg, community clinic, academic hospital) and list of countries where data will be collected. Reference to where list of study sites can be obtained                                                                                                                                                                                             | 6-7                   |
| Eligibility criteria                                      | 10  | Inclusion and exclusion criteria for participants. If applicable, eligibility criteria for study centres and individuals who will perform the interventions (eg, surgeons, psychotherapists)                                                                                                                                                                                   | 7                     |
| Interventions                                             | 11a | Interventions for each group with sufficient detail to allow replication, including how and when they will be administered                                                                                                                                                                                                                                                     | 9-12                  |
|                                                           | 11b | Criteria for discontinuing or modifying allocated interventions for a given trial participant (eg, drug dose change in response to harms, participant request, or improving/worsening disease)                                                                                                                                                                                 | N/A                   |
|                                                           | 11c | Strategies to improve adherence to intervention protocols, and any procedures for monitoring adherence (eg, drug tablet return, laboratory tests)                                                                                                                                                                                                                              | 12 (reminders emails) |
|                                                           | 11d | Relevant concomitant care and interventions that are permitted or prohibited during the trial                                                                                                                                                                                                                                                                                  | N/A                   |
| Outcomes                                                  | 12  | Primary, secondary, and other outcomes, including the specific measurement variable (eg, systolic blood pressure), analysis metric (eg, change from baseline, final value, time to event), method of aggregation (eg, median, proportion), and time point for each outcome. Explanation of the clinical relevance of chosen efficacy and harm outcomes is strongly recommended | 13-14                 |
| Participant timeline                                      | 13  | Time schedule of enrolment, interventions (including any run-ins and washouts), assessments, and visits for participants. A schematic diagram is highly recommended (see Figure)                                                                                                                                                                                               | 8 (fig 1); 12         |
| Sample size                                               | 14  | Estimated number of participants needed to achieve study objectives and how it was determined, including clinical and statistical assumptions supporting any sample size calculations                                                                                                                                                                                          | 14-15                 |
| Recruitment                                               | 15  | Strategies for achieving adequate participant enrolment to reach target sample size                                                                                                                                                                                                                                                                                            | 6-7; 14-15            |

| <b>Methods: Assignment of interventions (for controlled trials)</b> |     |                                                                                                                                                                                                                                                                                                                                                                                                              |                          |
|---------------------------------------------------------------------|-----|--------------------------------------------------------------------------------------------------------------------------------------------------------------------------------------------------------------------------------------------------------------------------------------------------------------------------------------------------------------------------------------------------------------|--------------------------|
| <b>Allocation</b>                                                   |     |                                                                                                                                                                                                                                                                                                                                                                                                              |                          |
| Sequence generation                                                 | 16a | Method of generating the allocation sequence (eg, computer generated random numbers), and list of any factors for stratification. To reduce predictability of a random sequence, details of any planned restriction (eg, blocking) should be provided in a separate document that is unavailable to those who enrol participants or assign interventions                                                     | 7                        |
| Allocation concealment mechanism                                    | 16b | Mechanism of implementing the allocation sequence (eg, central telephone; sequentially numbered, opaque, sealed envelopes), describing any steps to conceal the sequence until interventions are assigned                                                                                                                                                                                                    | 7                        |
| Implementation                                                      | 16c | Who will generate the allocation sequence, who will enrol participants, and who will assign participants to interventions                                                                                                                                                                                                                                                                                    | 7                        |
| Blinding (masking)                                                  | 17a | Who will be blinded after assignment to interventions (eg, trial participants, care providers, outcome assessors, data analysts), and how                                                                                                                                                                                                                                                                    | 18                       |
|                                                                     | 17b | If blinded, circumstances under which unblinding is permissible, and procedure for revealing a participant's allocated intervention during the trial                                                                                                                                                                                                                                                         | N/A                      |
| <b>Methods: Data collection, management, and analysis</b>           |     |                                                                                                                                                                                                                                                                                                                                                                                                              |                          |
| Data collection methods                                             | 18a | Plans for assessment and collection of outcome, baseline, and other trial data, including any related processes to promote data quality (eg, duplicate measurements, training of assessors) and a description of study instruments (eg, questionnaires, laboratory tests) along with their reliability and validity, if known. Reference to where data collection forms can be found, if not in the protocol | 12-14                    |
|                                                                     | 18b | Plans to promote participant retention and complete follow-up, including list of any outcome data to be collected for participants who discontinue or deviate from intervention protocols                                                                                                                                                                                                                    | 12<br>(reminders emails) |
| Data management                                                     | 19  | Plans for data entry, coding, security, and storage, including any related processes to promote data quality (eg, double data entry; range checks for data values). Reference to where details of data management procedures can be found, if not in the protocol                                                                                                                                            | 18-19                    |

|                                 |     |                                                                                                                                                                                                                                                                                                                                       |                                                                      |
|---------------------------------|-----|---------------------------------------------------------------------------------------------------------------------------------------------------------------------------------------------------------------------------------------------------------------------------------------------------------------------------------------|----------------------------------------------------------------------|
| Statistical methods             | 20a | Statistical methods for analysing primary and secondary outcomes. Reference to where other details of the statistical analysis plan can be found, if not in the protocol                                                                                                                                                              | 16-18                                                                |
|                                 | 20b | Methods for any additional analyses (eg, subgroup and adjusted analyses)                                                                                                                                                                                                                                                              | 16-18                                                                |
|                                 | 20c | Definition of analysis population relating to protocol non-adherence (eg, as randomised analysis), and any statistical methods to handle missing data (eg, multiple imputation)                                                                                                                                                       | 16                                                                   |
| <b>Methods: Monitoring</b>      |     |                                                                                                                                                                                                                                                                                                                                       |                                                                      |
| Data monitoring                 | 21a | Composition of data monitoring committee (DMC); summary of its role and reporting structure; statement of whether it is independent from the sponsor and competing interests; and reference to where further details about its charter can be found, if not in the protocol. Alternatively, an explanation of why a DMC is not needed | N/A                                                                  |
|                                 | 21b | Description of any interim analyses and stopping guidelines, including who will have access to these interim results and make the final decision to terminate the trial                                                                                                                                                               | 15                                                                   |
| Harms                           | 22  | Plans for collecting, assessing, reporting, and managing solicited and spontaneously reported adverse events and other unintended effects of trial interventions or trial conduct                                                                                                                                                     | Supp (PIS)                                                           |
| Auditing                        | 23  | Frequency and procedures for auditing trial conduct, if any, and whether the process will be independent from investigators and the sponsor                                                                                                                                                                                           | N/A                                                                  |
| <b>Ethics and dissemination</b> |     |                                                                                                                                                                                                                                                                                                                                       |                                                                      |
| Research and ethics approval    | 24  | Plans for seeking research ethics committee/institutional review board (REC/IRB) approval                                                                                                                                                                                                                                             | 19                                                                   |
| Protocol amendments             | 25  | Plans for communicating important protocol modifications (eg, changes to eligibility criteria, outcomes, analyses) to relevant parties (eg, investigators, REC/IRBs, trial participants, trial registries, journals, regulators)                                                                                                      | N/A as not anticipated; however protocol updates can be as per trial |

|                               |     |                                                                                                                                                                                                                                                                                     |                  |
|-------------------------------|-----|-------------------------------------------------------------------------------------------------------------------------------------------------------------------------------------------------------------------------------------------------------------------------------------|------------------|
|                               |     |                                                                                                                                                                                                                                                                                     | registry pg<br>3 |
| Consent or assent             | 26a | Who will obtain informed consent or assent from potential trial participants or authorised surrogates, and how (see Item 32)                                                                                                                                                        | 6-7, Supp<br>PIS |
|                               | 26b | Additional consent provisions for collection and use of participant data and biological specimens in ancillary studies, if applicable                                                                                                                                               | N/A              |
| Confidentiality               | 27  | How personal information about potential and enrolled participants will be collected, shared, and maintained in order to protect confidentiality before, during, and after the trial                                                                                                | 18-19            |
| Declaration of interests      | 28  | Financial and other competing interests for principal investigators for the overall trial and each study site                                                                                                                                                                       | 22               |
| Access to data                | 29  | Statement of who will have access to the final trial dataset, and disclosure of contractual agreements that limit such access for investigators                                                                                                                                     | 19               |
| Ancillary and post-trial care | 30  | Provisions, if any, for ancillary and post-trial care, and for compensation to those who suffer harm from trial participation                                                                                                                                                       | N/A              |
| Dissemination policy          | 31a | Plans for investigators and sponsor to communicate trial results to participants, healthcare professionals, the public, and other relevant groups (eg, via publication, reporting in results databases, or other data sharing arrangements), including any publication restrictions | 18               |
|                               | 31b | Authorship eligibility guidelines and any intended use of professional writers                                                                                                                                                                                                      | N/A              |
|                               | 31c | Plans, if any, for granting public access to the full protocol, participant level dataset, and statistical code                                                                                                                                                                     | 3, 18-19         |
| <b>Appendices</b>             |     |                                                                                                                                                                                                                                                                                     |                  |
| Informed consent materials    | 32  | Model consent form and other related documentation given to participants and authorised surrogates                                                                                                                                                                                  | Supp PIS         |
| Biological specimens          | 33  | Plans for collection, laboratory evaluation, and storage of biological specimens for genetic or molecular analysis in the current trial and for future use in ancillary studies, if applicable                                                                                      | N/A              |

1  
2  
3  
4  
5  
6  
7  
8  
9  
10  
11  
12  
13  
14  
15  
16  
17  
18  
19  
20  
21  
22  
23  
24  
25  
26  
27  
28  
29  
30  
31  
32  
33  
34  
35  
36  
37  
38  
39  
40  
41  
42  
43  
44  
45  
46

\*It is strongly recommended that this checklist be read in conjunction with the SPIRIT 2013 Explanation & Elaboration for important clarification on the items. Amendments to the protocol should be tracked and dated. The SPIRIT checklist is copyrighted by the SPIRIT Group under the Creative Commons “Attribution-NonCommercial-NoDerivs 3.0 Unported” license.

For peer review only

# BMJ Open

## Accounting for health literacy and intervention preferences when reducing unhealthy snacking: Protocol for an online randomized controlled trial

|                                 |                                                                                                                                                                                                                                                                                                                                                                                                                                                                                                                                                                                                                                                                                                                                                                                        |
|---------------------------------|----------------------------------------------------------------------------------------------------------------------------------------------------------------------------------------------------------------------------------------------------------------------------------------------------------------------------------------------------------------------------------------------------------------------------------------------------------------------------------------------------------------------------------------------------------------------------------------------------------------------------------------------------------------------------------------------------------------------------------------------------------------------------------------|
| Journal:                        | <i>BMJ Open</i>                                                                                                                                                                                                                                                                                                                                                                                                                                                                                                                                                                                                                                                                                                                                                                        |
| Manuscript ID                   | bmjopen-2018-028544.R1                                                                                                                                                                                                                                                                                                                                                                                                                                                                                                                                                                                                                                                                                                                                                                 |
| Article Type:                   | Protocol                                                                                                                                                                                                                                                                                                                                                                                                                                                                                                                                                                                                                                                                                                                                                                               |
| Date Submitted by the Author:   | 03-Mar-2019                                                                                                                                                                                                                                                                                                                                                                                                                                                                                                                                                                                                                                                                                                                                                                            |
| Complete List of Authors:       | Ayre, Julie; The University of Sydney, Faculty of Medicine and Health, Sydney School of Public Health, Sydney Health Literacy Lab<br>Cvejic, Erin; The University of Sydney, Faculty of Medicine and Health, Sydney School of Public Health, Sydney Health Literacy Lab<br>Bonner, Carissa; The University of Sydney, Faculty of Medicine and Health, Sydney School of Public Health, Sydney Health Literacy Lab<br>Turner, Robin ; University of Otago, Division of Health Sciences, Biostatistics Unit<br>Walter, Stephen ; McMaster University , Faculty of Health Sciences, Department of Health Research Methods, Evidence and Impact<br>McCaffery, Kirsten; The University of Sydney, Faculty of Medicine and Health, Sydney School of Public Health, Sydney Health Literacy Lab |
| <b>Primary Subject Heading</b>: | Public health                                                                                                                                                                                                                                                                                                                                                                                                                                                                                                                                                                                                                                                                                                                                                                          |
| Secondary Subject Heading:      | Diabetes and endocrinology                                                                                                                                                                                                                                                                                                                                                                                                                                                                                                                                                                                                                                                                                                                                                             |
| Keywords:                       | General diabetes < DIABETES & ENDOCRINOLOGY, PREVENTIVE MEDICINE, PUBLIC HEALTH                                                                                                                                                                                                                                                                                                                                                                                                                                                                                                                                                                                                                                                                                                        |
|                                 |                                                                                                                                                                                                                                                                                                                                                                                                                                                                                                                                                                                                                                                                                                                                                                                        |

SCHOLARONE™  
Manuscripts

## ACCOUNTING FOR HEALTH LITERACY AND INTERVENTION PREFERENCES

1  
2  
3 Title

4  
5  
6 Accounting for health literacy and intervention preferences  
7  
8  
9  
10  
11 when reducing unhealthy snacking: Protocol for an online  
12  
13  
14  
15 randomized controlled trial  
16  
17  
18  
19

20 Julie Ayre<sup>1\*</sup>, Erin Cvejic<sup>2</sup>, Carissa Bonner<sup>1</sup>, Robin M Turner<sup>3</sup>, Stephen D Walter<sup>4</sup>, Kirsten J  
21 McCaffery<sup>1</sup>  
22

23  
24  
25 <sup>1</sup>The University of Sydney, Faculty of Medicine and Health, School of Public Health, Sydney Health  
26 Literacy Lab, NSW, Australia  
27

28  
29  
30 <sup>2</sup>The University of Sydney, Faculty of Medicine and Health, School of Public Health, NSW, Australia  
31

32  
33 <sup>3</sup>University of Otago, Division of Health Sciences, Biostatistics Unit  
34

35  
36 <sup>4</sup>McMaster University, Faculty of Health Sciences, Department of Health Research Methods,  
37 Evidence, and Impact  
38

39  
40 \* Corresponding author  
41

42  
43 E-mail: [julie.ayre@sydney.edu.au](mailto:julie.ayre@sydney.edu.au)  
44  
45  
46  
47  
48  
49  
50  
51  
52  
53  
54  
55  
56  
57  
58  
59  
60

## ACCOUNTING FOR HEALTH LITERACY AND INTERVENTION PREFERENCES

## Abstract

### Introduction

Health literacy describes the cognitive and social skills that individuals use to access, understand and act on health information. Health literacy interventions typically take the ‘universal precautions approach’ where all consumers are presented with simplified materials. Although this approach can improve knowledge and comprehension, its impact on complex behaviours is less clear. Systematic reviews also suggest health literacy interventions underutilise volitional strategies (such as planning) that play an important role in behaviour change. A recent study found volitional strategies may need to be tailored to the participant’s health literacy. The current study aims to replicate these findings in a sample of people who have diabetes and/or are overweight or obese as measured by BMI, and to investigate the most effective method of allocating an action plan to a participant to reduce unhealthy snacking.

### Methods and analysis

We plan to recruit approximately 2,400 participants at baseline. Participants will receive one of two alternative online action plans intended to reduce unhealthy snacking (‘standard’ action plan or ‘literacy-sensitive’ action plan). Participants will be randomised to a method of allocation to an action plan: 1) random allocation; 2) allocation by health literacy screening tool; or 3) allocation by participant selection. Primary outcome is self-reported serves of unhealthy snacks during the previous month. Multiple linear regression will evaluate the impact of health literacy on intervention effectiveness. The analysis will also identify independent contributions of each action plan, method of allocation, health literacy, and participant selections on unhealthy snacking at 4-week follow-up.



## ACCOUNTING FOR HEALTH LITERACY AND INTERVENTION PREFERENCES

**Ethics and dissemination**

This study was approved by the University of Sydney Human Research Ethics Committee [2017/793] and is registered with Australian New Zealand Clinical Trials Registry: ACTRN12618001409268p. Findings will be disseminated through peer-reviewed international journals, conferences and updates with collaborating public health bodies (Diabetes NSW & ACT, and Western Sydney Local Health District).

**Article Summary****Strengths and limitations of this study**

- The impact of literacy-sensitive design on the effectiveness of an action plan intervention to reduce unhealthy snacking in a sample of people with diverse health literacy levels will be evaluated.
- The analysis will isolate the effects of each action plan intervention (standard and literacy-sensitive) from the effects of allocation method (random, screened or choice), the participant's health literacy (as categorised using the screening tool) and the effect of providing a choice of interventions.
- Free-text plans in this study will undergo content analysis to assess the quality of plans created by people with higher and lower health literacy.
- The impact of assessing participant preference prior to random allocation to an intervention on outcomes will also be explored.
- This study uses a subjective outcome measure (self-reported monthly unhealthy snacking collected at a single time-point) rather than an objective measure (e.g. unhealthy snacking observed throughout the month-long period) or more frequently reported subjective measure, which may limit the study findings.

## ACCOUNTING FOR HEALTH LITERACY AND INTERVENTION PREFERENCES

## Introduction

Health literacy describes the cognitive and social skills that enable individuals to access, understand and act on health information (1). Low health literacy is increasingly recognised as an important contributor to health inequality and is associated with increased hospitalization, mortality, prevalence of chronic disease and risk factors for health conditions (2). Low health literacy is common worldwide, with estimates ranging from 36 – 60% of the population in Australia, Europe and the US (3-5).

Current approaches to address health literacy issues have focused on providing all consumers, regardless of their health literacy level, with health information that is easy to process and understand (2, 6). Whilst this ‘universal precautions approach’ has been shown to improve health knowledge, it is less clear whether it is effective for improving complex behaviours such as healthy eating and increased physical activity (2, 7, 8). This may reflect the fact that health literacy guidelines and interventions place relatively little emphasis on strategies that promote action, such as planning, self-monitoring or problem solving (9-13). These kinds of strategies are increasingly recognised as key components of lifestyle interventions (14); furthermore, there has been little research investigating how they could be adapted for audiences with lower health literacy.

A recent randomized control trial (RCT) has investigated the effects of literacy-sensitive design on action plans to reduce unhealthy snacking behaviour (15). This design incorporated health literacy strategies (e.g. simple language) and separated the planning process into distinct steps to reduce cognitive demands. This ‘literacy-sensitive’ action plan was compared to action plan instructions that have been used in samples of the general population (16). The results from this study suggested that people with lower health literacy reported consuming

## ACCOUNTING FOR HEALTH LITERACY AND INTERVENTION PREFERENCES

1  
2  
3 fewer unhealthy snacks at follow-up when they had used the literacy-sensitive action plan,  
4  
5 whereas people with higher health literacy reported consuming fewer unhealthy snacks using  
6  
7 the 'standard' action plan (15).  
8  
9

10  
11 The current study will build on these findings by evaluating the most effective way to  
12  
13 determine the best action plan for participants. One obvious approach is to allocate an action  
14  
15 plan based on a participant's health literacy score. Alternatively, participants could be asked  
16  
17 to select the plan they would prefer to follow. Although allowing the participant to choose  
18  
19 their plan might less accurately match a participant to an action plan that meets their health  
20  
21 literacy needs, there are some potential additional advantages to this approach. For example,  
22  
23 participants would be able to factor in other relevant aspects (such as their motivation to  
24  
25 engage with the planning process) (17), and presenting participants with different options  
26  
27 may also encourage greater satisfaction with the intervention (18). This is further supported  
28  
29 by evidence that the effects of interventions in randomized controlled trials may be increased  
30  
31 when participants receive their preferred intervention (19).  
32  
33  
34  
35  
36

37  
38 This study has three key aims. Firstly, this study aims to evaluate the impact of health literacy  
39  
40 and a literacy-sensitive action plan on unhealthy snacking in a sample of people with type 2  
41  
42 diabetes and/or overweight or obese BMI. In doing so this study aims to replicate previous  
43  
44 findings in a clinical sample (15).  
45  
46  
47

48  
49 The second aim is to evaluate how the *method of allocation* to either intervention (literacy-  
50  
51 sensitive or standard action plan) affects the overall effectiveness of the intervention. Three  
52  
53 methods of allocation will be evaluated: 1) random allocation to an action plan; 2) allocation  
54  
55 to an action plan based on individual health literacy; or 3) allowing participants to choose  
56  
57 which action plan they use. This study will employ a two-stage randomization (Rucker)  
58  
59 design (20). This design allows estimation of the effects of each action plan on outcomes (the  
60

## ACCOUNTING FOR HEALTH LITERACY AND INTERVENTION PREFERENCES

1  
2  
3 treatment effect), independent of the effects of a person receiving their preferred treatment  
4  
5 (preference effect) and the effects of self-selection (selection effect). This is the only  
6  
7 preference trial design that allows this delineation of all these effects (21).  
8  
9

10  
11 The third aim is to evaluate whether assessment of participant preference for an intervention  
12  
13 prior to random allocation influences the effectiveness of the intervention. This addresses an  
14  
15 unanswered question in research on the effects of treatment preference on study outcomes  
16  
17 i.e., does assessment of preference introduce a methodological artefact by increasing the  
18  
19 salience of discrepancies between an individual's preferred and received treatments and in  
20  
21 doing so, have a negative effect on intervention outcomes (21)?  
22  
23  
24  
25

26 We hypothesise that:

- 27  
28  
29  
30 1. A literacy-sensitive action plan will be more effective at reducing unhealthy snacking for  
31  
32 participants with lower health literacy, whereas the standard action plan will be more  
33  
34 effective for participants with higher health literacy.  
35  
36  
37  
38 2. The intervention will be more effective at reducing unhealthy snacking for participants  
39  
40 who are allocated an action plan using the health literacy screening tool compared to those  
41  
42 who are asked to select their preferred action plan. Both of these allocation methods will be  
43  
44 more effective than random allocation to an action plan.  
45  
46  
47  
48 3. Assessing preference will negatively impact plan effectiveness, an effect which will be  
49  
50 greater for those who are randomised to the plan which is discordant with their preference.  
51  
52  
53  
54  
55  
56  
57  
58  
59  
60

## ACCOUNTING FOR HEALTH LITERACY AND INTERVENTION PREFERENCES

## Methods and analysis

### Study Design

The design is a three parallel-arm online RCT to test the effect of health literacy, type of action plan, and method of allocation to an action plan on self-reported unhealthy snacking behaviour. The three methods of allocation are 1) random 2) use of a health literacy screening tool to allocate participants one of the two action plans ('screened' arm) and 3) participant choice of action plan ('choice' arm). This study will also evaluate whether the process of assessing preference for a particular action plan prior to randomisation will have an impact on subsequent self-reported snacking behaviour. A schematic representation of the study design is shown in Figure 1.

### Participants and recruitment

The proposed study will seek to recruit 2,352 Australian participants with type 2 diabetes. Participants will be recruited through an online market research company, Dynata, which has a pool of approximately 10,000 Australians with type 2 diabetes. This sample will be supplemented with additional participants from Dynata who have self-reported height and weight corresponding to an overweight or obese BMI (i.e.,  $\text{BMI} \geq 25 \text{ kg/m}^2$ ). Participants will be eligible to participate if they are registered with Dynata's Australian registry, are over 18 years of age (adult population), and self-report that they have type 2 diabetes or self-report a height and weight that correspond to overweight or obese BMI. Participants will be excluded if they do not speak English. Participants will not be excluded on the basis of their snacking behaviour. Recruitment commenced February 14<sup>th</sup>, 2019.

Participants who click the link received from Dynata will be presented with a brief introduction to the study and a link to the Participant Information Sheet (see Supplementary File 1). Informed consent will be indicated by completion of the online survey, as outlined in

## ACCOUNTING FOR HEALTH LITERACY AND INTERVENTION PREFERENCES

1  
2  
3 the Participant Information Sheet. On the next page, participants then begin the baseline  
4  
5 survey.  
6  
7

### 8 9 Patient and public involvement

10  
11 Patients and public were not directly involved in development of the research question,  
12  
13 however, consumer health representatives living with type 2 diabetes were consulted for  
14  
15 feedback at multiple stages of intervention and study development, including: intervention  
16  
17 instructions, the appropriateness of the literacy sensitive plans, and the ease with which  
18  
19 feedback at follow-up could be communicated. Participants in the trial are able to indicate if  
20  
21 they are interested in receiving a lay summary of the study results which will be disseminated  
22  
23 through email by Dynata (further maintaining participants anonymity). We will also assess  
24  
25 participant burden and acceptability using the pilot data. Lastly, participants will be able to  
26  
27 provide feedback on the perceived burden of the intervention using free text fields during the  
28  
29 follow-up survey.  
30  
31  
32  
33

### 34 35 Participant allocation

36  
37 After completing baseline measures participants will be randomised to one of three allocation  
38  
39 methods using the 'Survey Flow' and 'Randomiser' functions included in the survey platform  
40  
41 (Qualtrics) (Figure 1). The 'Randomiser' is based on the Mersenne Twister, a pseudorandom  
42  
43 number generator. This allocation method will determine how the planning tool (either  
44  
45 literacy-sensitive or standard) is assigned to the participant. Participants in the random arm  
46  
47 will be unaware of their allocation method. At baseline, only the participants in the choice  
48  
49 arm and those who are randomised to assess prior preference in the random arm will be aware  
50  
51 of the two different tool versions. Participants in the screened arm will be aware that there is  
52  
53 more than one tool available.  
54  
55  
56  
57  
58  
59  
60

ACCOUNTING FOR HEALTH LITERACY AND INTERVENTION PREFERENCES

[Figure 1 here]

**Figure 1: Anticipated participant recruitment and attrition to achieve sufficient sample size**

For peer review only

1  
2  
3  
4  
5  
6  
7  
8  
9  
10  
11  
12  
13  
14  
15  
16  
17  
18  
19  
20  
21  
22  
23  
24  
25  
26  
27  
28  
29  
30  
31  
32  
33  
34  
35  
36  
37  
38  
39  
40  
41  
42  
43  
44  
45  
46

## ACCOUNTING FOR HEALTH LITERACY AND INTERVENTION PREFERENCES

*Allocation method*

1. **Random (Arm A):** Participants randomised to the ‘random’ arm will be further randomised to either 1) assess their prior preferences (i.e. their preferred action plan; Arm A1), and then randomised to the standard or literacy-sensitive action plan; or 2) randomised to the standard or literacy-sensitive action plan without assessment of prior preferences (Arm A2; Figure 1). Prior preference will be measured using the same format as in the ‘participant choice’ arm (Arm C) with additional text stating that participants may not receive their preferred tool.
2. **Screened (Arm B):** Allocation is based on assessment of health literacy using the Newest Vital Sign (NVS) measure (22). The literacy-sensitive action plan will be allocated to those scoring less than 4 (indicative of inadequate health literacy), and the standard action plan will be allocated to the remaining participants. Participants will be told that, based on their responses, the researchers have selected an action plan tool that is most suitable for them.
3. **Choice (Arm C):** Participants will be provided with a brief description of the action plans and select the plan they want to use. Order of presentation of the two plans is randomised. In the first instance, participants have the option of selecting ‘Unsure’ to allow for undecided participants. Participants will then be presented with an alternative description of the study and asked again to make a choice. Participants will be informed that if they select ‘Unsure’ again, the researchers will select a plan for them. In doing so, participants will be randomised to an action plan as per Rucker protocol (20).

*Action plan interventions*

Either a literacy-sensitive or standard action plan will be allocated to participants. The text used in each tool is presented below:



## ACCOUNTING FOR HEALTH LITERACY AND INTERVENTION PREFERENCES

**Literacy-sensitive action plan (“Smart Snacking 101 (basic)”):** This commences with the text: “We want you to plan how you will change your unhealthy snacking behaviour each day because forming plans has been shown to improve snacking habits”. The intervention consists of 4 steps that guide the participant through the process of developing an appropriate plan (also shown in Figure 2):

1. Step 1: Sometimes we snack because we are hungry, but there are lots of other reasons. Think about your snacks in the last week. Below is a list of ‘snack moments.’ These are times when people tend to choose unhealthy snacks or eat too much. Choose 3 snack moments from the list that happened to you the most often in the last week. [Participants selects from list of snack moments].
2. Step 2: Below are your top 3 snack moments. Some snack moments will be more important than others. Choose the 1 that you would be happiest to change. [Participant chooses from 3 previously selected snack moments]
3. Step 3: Great! Your most important snack moment was snacking because you are [example snack moment: bored]. The last step is to come up with a plan! Choose the solution that you think will work best for you. Drag it into the space on the right. [Participants selects from list of solutions]
4. Step 4: Imagine how your plan might feel. [examples of scenarios when this might happen]. The final step is to make sure the plan is realistic. How hard do you think it will be to do this plan for the next month [Slider options range from very easy (1) to very hard (10). If the participant selects a number greater than or equal to 7 they will be prompted to revise the plan]

[Figure 2 here]

## ACCOUNTING FOR HEALTH LITERACY AND INTERVENTION PREFERENCES

1  
2  
3 **Figure 2: Mobile screenshots from *literacy-sensitive action plan*. From left to right: a)**  
4  
5 **Step 1: Selecting top 3 snacking scenarios; b) Step 2: Selecting 1 key scenario; c) Step 3:**  
6  
7 **Selecting a solution; d) Step 4: Imagining the plan**  
8  
9

10  
11  
12  
13  
14 **Standard action plan (“Smart Snacking Pro (advanced)”):** Participants receive the  
15 following instructions: “We want you to plan how you will change your unhealthy snacking  
16 behaviour each day, because forming plans has been shown to improve snacking habits. You  
17 are free to choose how you do this but we want you to formulate your plans in as much detail  
18 as possible. Pay attention to the situations in which you will implement (carry out) these  
19 plans. Focus on situations when you are not hungry but find yourself snacking. Please enter  
20 your situations and your plans below.”  
21  
22  
23  
24  
25  
26  
27  
28  
29  
30

31 After completing either action plan participants will be presented with their plan for a final  
32 time and instructed to write down, take a screenshot or make a copy of it. Participants will  
33 also be asked to confirm that they have a copy of the plan. We have incorporated behaviour  
34 change techniques into each intervention. These are described in detail in the Supplementary  
35 File 2.  
36  
37  
38  
39  
40  
41  
42  
43

#### 44 *Baseline and follow-up surveys*

45  
46 At baseline participants will complete demographic questions and measures of health literacy.  
47 They will then receive information about general reasons for reducing unhealthy snacking  
48 and a definition of unhealthy snacks. Participants then complete measures of snacking  
49 behaviour, habit strength (concerning consumption of unhealthy snacks), and intentions to  
50 reduce unhealthy snacking. Intention to reduce unhealthy snacking will be measured again,  
51 immediately after creating the plan. Participants will be emailed a reminder of their personal  
52  
53  
54  
55  
56  
57  
58  
59  
60

## ACCOUNTING FOR HEALTH LITERACY AND INTERVENTION PREFERENCES

1  
2  
3 plan at baseline (within the first week), and before then end of the 2nd and 3rd weeks to  
4  
5 increase compliance and retention. Participants will complete a follow-up survey after 4  
6  
7 weeks. The follow-up survey consists of the same description of reasons to reduce unhealthy  
8  
9 snacking and definition, followed by measures of snacking behaviour, habit strength and  
10  
11 intention. Action control will also be measured in the follow-up survey.  
12  
13  
14

## 15 Measures

### 16 *Screening measures*

17  
18 Prior to beginning the survey, participants will be asked to indicate whether they have type 2  
19  
20 diabetes, and to provide their height (cm or feet and inches) and weight (kg).  
21  
22  
23

### 24 *Demographic measures*

25  
26 Participants will be asked to complete questions about their age, employment status, highest  
27  
28 level of educational attainment, and, if they report having diabetes, years since diagnosis and  
29  
30 whether or not they use insulin.  
31  
32  
33

### 34 *Health literacy*

35  
36 Health literacy will be measured using the Newest Vital Sign (NVS)(22), a 6-item measure of  
37  
38 functional health literacy, and a single-item literacy screener (23). NVS scores of 0-1 indicate  
39  
40 a high likelihood of limited healthy literacy, scores of 2-3 indicate the possibility of limited  
41  
42 health literacy and scores of 4-6 indicate adequate health literacy.  
43  
44  
45

### 46 *Need for cognition*

47  
48 Need for cognition describes the extent that an individual engages in and enjoys cognitively  
49  
50 effortful activities (i.e. activities that require a lot of thinking) (24). Three items on a 7-point  
51  
52 likert scale (strongly disagree to strongly agree) will assess the participant's need for  
53  
54 cognition (25).  
55  
56  
57  
58  
59  
60

## ACCOUNTING FOR HEALTH LITERACY AND INTERVENTION PREFERENCES

*Primary outcome***Snack scores (previous month)**

Snacking scores will be measured using a validated 7-item measure based on a diet score developed by the Commonwealth Scientific and Industrial Research Organisation (CSIRO) (26). Items are drawn from the ‘discretionary foods’ category which the Australian Guidelines to Healthy Eating define as foods ‘not considered necessary for a healthy diet’. Alcohol was excluded from the assessment in this study as the focus is on ‘snacks.’ Participants answer how many serves of unhealthy snacks they ate in the past month. Participants can answer according to the number of serves per day, week or month. Average weekly serves of unhealthy snacks will be calculated from these scores. Although electronic diaries might overcome some limitations of once-off measures of snacking behaviour such as that described above, electronic diaries were unavailable at the time of study development due to the budget and technical constraints. This approach chosen also reduces participant burden and minimises the risk of missing data.

*Secondary outcomes***Perceived unhealthy/healthy snacking (previous week)**

Two items, each on a 7-point Likert scale will assess perceived extent of healthy and unhealthy snacking in the previous week, respectively. Healthy snacks are described to participants as those that are low in kilojoules, fat, salt and sugars. Unhealthy snacks are described as high in kilojoules, fat, salt and sugars. Examples of healthy and unhealthy snacks are provided.

**Intention, habit strength and action control**

The measure of intention consists of 3 items that ask about the participant’s intention to reduce unhealthy snacking (27, 28). Habit strength will be assessed using the 12-item self-

## ACCOUNTING FOR HEALTH LITERACY AND INTERVENTION PREFERENCES

report habit strength index (29), and action control will be assessed using a 6-item measure (30). Responses to each item are recorded on 7-point Likert scales (strongly disagree to strongly agree).

#### Difficulty using the planning tool

A single item will ask participants to rate how hard it was to use the planning tool (1=not at all hard, 5=extremely hard).

#### Preferred action plan at follow-up

At follow-up, participants will be reminded of the name and logo used for their plan.

Participants will be shown an image slider that contains screenshots from the other action plan. Participants will then be asked: "If you were given the choice, which action plan would you prefer to use next time?"

#### Sample size

The proposed study will seek to analyse a sample of 2,000 Australian participants at follow-up with high BMI (overweight/obese) and/or type 2 diabetes. At baseline participants will be randomised at a ratio of 2:1:1 to each allocation method arm, such that there are a total of 1,000 participants in the random arm (who will then be evenly randomised to assess or not assess their preference for a particular action plan before they are ultimately randomised to an action plan), and 500 in the two remaining allocation method arms (the screened and choice arms). With a two sided alpha of 0.05 and power of 80%, a sample of this size will allow us to detect a small main effect of  $f = 0.08$  in a univariate ANOVA comparing the three allocation method arms and in a univariate ANOVA comparing the two prior-preference assessment arms; this corresponds to a minimum pairwise difference between the two most extreme mean values of approximately 0.18 standard deviations. Estimates of effect size are based on the outcome of previous work exploring the effects of action plans on unhealthy snacking (15).

## ACCOUNTING FOR HEALTH LITERACY AND INTERVENTION PREFERENCES

Based on our previous studies recruiting through this provider, we anticipate an attrition rate no greater than 15% by one month follow-up. Therefore, we estimate a total of 2,352 should be recruited at baseline to ensure sufficient sample size for analysis.

A sample of this size will also ensure that there is at least 80% power for secondary analysis conducted to estimate treatment and preference effects (20, 31) with a treatment effect between the two interventions (literacy-sensitive and standard planning tools) as small as 0.25 standard deviations (estimated as 5 snacks per month based on previous findings (15)), and a preference effect, comparing those who received their preferred tool to those who did not, as small as 0.35 standard deviations (approximately 7 snacks per month). This assumes that approximately equal proportions of participants will choose the literacy-sensitive and standard planning tools in the choice arm, and that there will be approximately equal proportions of participants allocated to each of these interventions in the screened arm.

### Piloting

The intervention will be piloted with 200 participants to check that approximately equal numbers of participants allocated to the choice condition select each of the interventions. If required, sample size estimates will be adjusted to ensure that the study is sufficiently powered. Piloting will also allow us to assess participant burden and intervention acceptability.

### Analysis:

Follow-up outcome measures for participants who do not complete the follow-up survey will be estimated for worst-case (no change in snacking score) and best-case scenarios (average-change in snack score). These estimates will be incorporated as an intention-to-treat analysis. Baseline characteristics of completers and non-completers will be compared to assess bias and generalisability.

## ACCOUNTING FOR HEALTH LITERACY AND INTERVENTION PREFERENCES

*Confirmatory analysis*

A confirmatory analysis will replicate the analysis previously reported (15) to examine if the treatment effect is modified by health literacy. Multiple linear regression models including an intervention group  $\times$  health literacy (NVS score) interaction term will be used to predict follow-up snacking scores and perceived difficulty using the plan. Important correlates of health literacy (age, level of education, language spoken at home) (2), diabetes status and baseline snacking will be controlled for in the model. NVS scores will be examined both continuously and categorically (i.e., inadequate vs. adequate health literacy).

*Assessment of prior preference analysis*

For participants in the random arm of the study, participants whose action plan preference was assessed prior to randomisation to an intervention will be compared to those whose preference was not assessed. Multiple linear regression (controlling for health literacy, age, level of education, language spoken at home and baseline snacking) will evaluate the effect of preference assessment on unhealthy snacking behaviour. For participants who provided a preference, an additional multiple linear regression will evaluate the effect of participants receiving their preferred intervention compared to those not receiving their preferred intervention on unhealthy snacking behaviour.

*Analysis of effects of allocation method*

The primary analysis will use regression to test for a difference in self-reported unhealthy snacking between the three randomised arms (random, screened, and choice) whilst adjusting for any effect of diabetes status. An adjusted model will also be constructed to allow for any baseline imbalances in the potential confounders including age, English as a second language, level of education. The analysis will be repeated on the secondary outcomes of perceived unhealthy snacking in the previous week, snacks consumed the previous day, difficulty using

## ACCOUNTING FOR HEALTH LITERACY AND INTERVENTION PREFERENCES

1  
2  
3 the planning tool, action control, and habit strength with similar adjustment for diabetes  
4  
5 status and any baseline imbalances. A sub-analysis will also be conducted on participants  
6  
7 with and without type 2 diabetes.  
8  
9

10  
11 An appropriate analysis that uses the available preference information will be used to  
12  
13 estimate treatment, preference and selection effects for the primary outcome (32). The  
14  
15 treatment effect compares the efficacy of the health literate action plan with the standard  
16  
17 action plan in the random arm. The preference effect and selection effects are estimated using  
18  
19 the random and choice arms. The preference effect measures the difference in self-reported  
20  
21 unhealthy snacking for those who received their preferred action plan compared to those who  
22  
23 did not receive their preferred action plan. The selection effect measures the difference  
24  
25 between those who would select the literacy-sensitive intervention with those who would  
26  
27 select the standard intervention regardless of which intervention they received. Secondary  
28  
29 analyses will adjust for diabetes status, and baseline imbalances in potential confounders  
30  
31 including age, English as a second language, level of education. Data from participants in the  
32  
33 screened arm will also be analysed in this manner, producing estimates analogous to the  
34  
35 preference and selection effects.  
36  
37  
38  
39  
40  
41

42 These effects will also be estimated for the secondary outcomes of perceived unhealthy  
43  
44 snacking in the previous week, snacks consumed the previous day, difficulty using the  
45  
46 planning tool, action control, and habit strength with similar adjustment for diabetes status  
47  
48 and any baseline imbalances.  
49  
50  
51

52 Bootstrapping, by taking repeated random samples with replacement, will be used to estimate  
53  
54 the difference between the preference effect (estimated using choice arm) and an analogous  
55  
56 effect estimated using the screened arm, as well as the difference between the selection effect  
57  
58 (estimated using the choice arm) and an analogous effect estimated using the screened arm.  
59  
60



## ACCOUNTING FOR HEALTH LITERACY AND INTERVENTION PREFERENCES

1  
2  
3 Bootstrapping will also be used to estimate the confidence intervals for non-continuous  
4  
5 outcome measures. The bootstrapping is necessary, as the variances for the estimated  
6  
7 differences and non-continuous outcomes have not been derived previously (33).  
8  
9

*Additional analysis*

10  
11  
12  
13 Two researchers will also independently code standard action plans to indicate the extent that  
14  
15 participants followed standard action plan instructions (that is, provided at least one  
16  
17 ‘situation’, and one ‘plan’) and the extent that plans differed from the pre-determined options  
18  
19 presented in the literacy-sensitive action plans (for example, situations or solutions that did  
20  
21 not correspond to options listed in the literacy-sensitive action plan, or strategies that fell  
22  
23 outside of the “If-then” construction. The latter may include, for example, making sure  
24  
25 healthy snacks are prepared in advance, or refraining from buying certain foods at the  
26  
27 supermarket). Coders will be blind to the health literacy level of participants. Any  
28  
29 disagreements will be systematically resolved through discussion. Results from this content  
30  
31 analysis will also inform a secondary analysis of the impact of allocation method and action  
32  
33 plan on snacking scores.  
34  
35  
36  
37  
38  
39

*Data management*

40  
41  
42 De-identified data will be captured electronically on the secure Qualtrics server. Data will be  
43  
44 stored securely in de-identified form, with a unique participant ID to link responses from the  
45  
46 baseline and follow-up surveys. In all forms of dissemination, only de-identified data will be  
47  
48 presented as group means and differences to maintain the anonymity of participants. In line  
49  
50 with National Health and Medical Research Council (NHMRC) recommendations, and  
51  
52 University of Sydney policies, all data will be kept for a minimum 5 years.  
53  
54  
55  
56  
57  
58  
59  
60

## ACCOUNTING FOR HEALTH LITERACY AND INTERVENTION PREFERENCES

### Ethics and dissemination

This study was approved by the University of Sydney Human Research Ethics Committee [2017/793]. The interventions used in this study are practical; they can be easily incorporated into existing self-management practices, particularly with the use of online technologies, and are low in cost. Ascertaining an effective way to tailor planning tools to health literacy level (that is, allowing the participant to choose by employing a screening tool) will provide valuable information for implementation in apps that target people with varying health literacy levels. Findings from this study will be disseminated through peer-reviewed publication and national and international conference presentations. Findings will also be disseminated through community and research partnerships with groups such as Western Sydney Diabetes.

## ACCOUNTING FOR HEALTH LITERACY AND INTERVENTION PREFERENCES

## Full references

1. Nutbeam D. Health literacy as a public health goal: a challenge for contemporary health education and communication strategies into the 21st century. *Health promotion international*. 2000;15(3):259-67.
2. Berkman ND, Sheridan SL, Donahue KE, Halpern DJ, Viera AJ, Crotty K, et al. Health literacy interventions and outcomes: An updated systematic review. *Evidence report/technology assessment*. 2011(199):1-941.
3. Australian Bureau of Statistics. Health Literacy, Australia, cat. no.4233.0. In: Statistics ABo, editor. Canberra: Australian Bureau of Statistics; 2006.
4. Kutner M, Greenburg E, Jin Y, Paulsen C. The Health Literacy of America's Adults: Results from the 2003 National Assessment of Adult Literacy. NCES 2006-483. National Center for Education Statistics. 2006.
5. World Health Organisation. In: Kickbush I, Pelikan JM, Apfel F, Tsouros AD, editors. *Health literacy: the solid facts*. 2013.
6. Meppelink CS, Smit EG, Diviani N, Van Weert JCM. Health Literacy and Online Health Information Processing: Unraveling the Underlying Mechanisms. *Journal of Health Communication*. 2016;21(sup2):109-20.
7. Sheridan SL, Halpern DJ, Viera AJ, Berkman ND, Donahue KE, Crotty K. Interventions for Individuals with Low Health Literacy: A Systematic Review. *Journal of Health Communication*. 2011;16(sup3):30-54.
8. Bailey SC, Brega AG, Crutchfield TM, Elasy T, Herr H, Kaphingst K, et al. Update on health literacy and diabetes. *Diabetes Educ*. 2014;40(5):581-604.
9. Schwarzer R. Modeling Health Behavior Change: How to Predict and Modify the Adoption and Maintenance of Health Behaviors. *Applied Psychology*. 2008;57(1):1-29.

## ACCOUNTING FOR HEALTH LITERACY AND INTERVENTION PREFERENCES

10. Hagger MS, Chatzisarantis NLD. An Integrated Behavior Change Model for Physical Activity. *Exercise and Sport Sciences Reviews*. 2014;42(2):62-9.
11. Brega A, Barnard J, Mabachi N, Weiss B, DeWalt D, Brach C, et al. AHRQ Health Literacy Universal Precautions Toolkit, 2nd Edition Rockville, MD: Agency for Healthcare Research and Quality; 2015 [updated February 2015. Available from: <http://www.ahrq.gov/professionals/quality-patient-safety/quality-resources/tools/literacy-toolkit/healthlittoolkit2.html>.
12. Kim SH, Lee A. Health-Literacy-Sensitive Diabetes Self-Management Interventions: A Systematic Review and Meta-Analysis. *Worldviews on Evidence-Based Nursing*. 2016;13(4):324-33.
13. Schaffler J, Leung K, Tremblay S, Merdsoy L, Belzile E, Lambrou A, et al. The Effectiveness of Self-Management Interventions for Individuals with Low Health Literacy and/or Low Income: A Descriptive Systematic Review. *Journal of General Internal Medicine*. 2018.
14. Michie S, Abraham C, Whittington C, McAteer J, Gupta S. Effective techniques in healthy eating and physical activity interventions: a meta-regression. *Health Psychology*. 2009;28(6):690.
15. Ayre J, Bonner C, Cvejic E, McCaffery K. Randomized trial of planning tools to reduce unhealthy snacking: implications for health literacy. *PloS one*2019; 14(1), e0209863.
16. Armitage CJ. Field experiment of a very brief worksite intervention to improve nutrition among health care workers. *Journal of Behavioral Medicine*. 2015;38(4):599-608.
17. Smith SG, Curtis LM, Wardle J, von Wagner C, Wolf MS. Skill Set or Mind Set? Associations between Health Literacy, Patient Activation and Health. *PLOS ONE*. 2013;8(9):e74373.

## ACCOUNTING FOR HEALTH LITERACY AND INTERVENTION PREFERENCES

18. Nguyen MH, Smets EMA, Bol N, Loos EF, Van Weert JCM. How Tailoring the Mode of Information Presentation Influences Younger and Older Adults' Satisfaction with Health Websites. *Journal of Health Communication*. 2018;1-11.
19. Preference Collaborative Review Group. Patients' preferences within randomised trials: systematic review and patient level meta-analysis. *BMJ*. 2008;337.
20. Rücker G. A two-stage trial design for testing treatment, self-selection and treatment preference effects. *Statistics in Medicine*. 1989;8(4):477-85.
21. Walter S, Turner R, Macaskill P, McCaffery K, Irwig L. Beyond the treatment effect: Evaluating the effects of patient preferences in randomised trials. *Statistical Methods in Medical Research*. 2017;26(1):489-507.
22. Weiss BD, Mays MZ, Martz W, Castro KM, DeWalt DA, Pignone MP, et al. Quick assessment of literacy in primary care: the newest vital sign. *Ann Fam Med*. 2005;3(6):514-22.
23. Wallace LS, Rogers ES, Roskos SE, Holiday DB, Weiss BD. BRIEF REPORT: Screening Items to Identify Patients with Limited Health Literacy Skills. *Journal of General Internal Medicine*. 2006;21(8):874-7.
24. Cacioppo JT, Petty RE. The need for cognition. *Journal of Personality and Social Psychology*. 1982;42(1):116-31.
25. Nikoloudakis IA, Crutzen R, Rebar AL, Vandelanotte C, Quester P, Dry M, et al. Can you elaborate on that? Addressing participants' need for cognition in computer-tailored health behavior interventions. *Health Psychology Review*. 2018:1-16.
26. Hendrie G, Baird D, Golley R, Noakes M. The CSIRO Healthy Diet Score: An Online Survey to Estimate Compliance with the Australian Dietary Guidelines. *Nutrients*. 2017;9(1):47.

## ACCOUNTING FOR HEALTH LITERACY AND INTERVENTION PREFERENCES

- 1  
2  
3 27. Verhoeven AAC, Adriaanse MA, de Ridder DTD, de Vet E, Fennis BM. Less is  
4 more: The effect of multiple implementation intentions targeting unhealthy snacking habits.  
5  
6 European Journal of Social Psychology. 2013;43(5):344-54.  
7  
8  
9  
10 28. Verhoeven AAC, Adriaanse MA, de Vet E, Fennis BM, de Ridder DTD. Identifying  
11 the 'if' for 'if-then' plans: Combining implementation intentions with cue-monitoring  
12  
13 targeting unhealthy snacking behaviour. Psychology & Health. 2014;29(12):1476-92.  
14  
15  
16  
17 29. Verplanken B, Orbell S. Reflections on Past Behavior: A Self-Report Index of Habit  
18 Strength. Journal of Applied Social Psychology. 2003;33(6):1313-30.  
19  
20  
21 30. Sniehotta FF, Scholz U, Schwarzer R. Bridging the intention-behaviour gap:  
22  
23 Planning, self-efficacy, and action control in the adoption and maintenance of physical  
24  
25 exercise. Psychology & Health. 2005;20(2):143-60.  
26  
27  
28 31. Turner RM, Walter SD, Macaskill P, McCaffery KJ, Irwig L. Sample Size and Power  
29  
30 When Designing a Randomized Trial for the Estimation of Treatment, Selection, and  
31  
32 Preference Effects. Medical Decision Making. 2014;34(6):711-9.  
33  
34  
35 32. McCaffery KJ, Turner R, Macaskill P, Walter SD, Chan SF, Irwig L. Determining the  
36  
37 Impact of Informed Choice: Separating Treatment Effects from the Effects of Choice and  
38  
39 Selection in Randomized Trials. Medical Decision Making. 2011;31(2):229-36.  
40  
41  
42 33. Cameron B, Peduzzi P, Esserman D. Extensions to the two-stage randomized trial  
43  
44 design for testing treatment, self-selection, and treatment preference effects to binary  
45  
46 outcomes. Statistics in Medicine. 2018;37(22):3147-78.  
47  
48  
49  
50  
51  
52  
53  
54  
55  
56  
57  
58  
59  
60

## ACCOUNTING FOR HEALTH LITERACY AND INTERVENTION PREFERENCES

### Authors' contributions

Conceptualisation, methodology, writing – review and editing: JA, CB, EC, RT, SW, KM

Investigation, project administration: JA

Writing – original draft preparation: JA, EC, RT

Software: RT

Supervision: EC, CB, KM

Funding acquisition: CB, JA, RT, KM

### Data availability statement

There are no data in this work. No data are as yet available for this study as recruitment is currently under way.

### Funding statement

This work was supported by Diabetes Australia, grant number G199678. This research is also supported by an Australian Government Research Training Program (RTP) Scholarship.

### Competing interests statement

Authors have no competing interests.

### Acknowledgements

We would like to thank our type 2 diabetes consumer health representatives Edward Hartley and Mike Font for their feedback and input into the design of this study. We would also like to acknowledge the CSIRO for their permission to use items from the discretionary foods components of the CSIRO diet score.

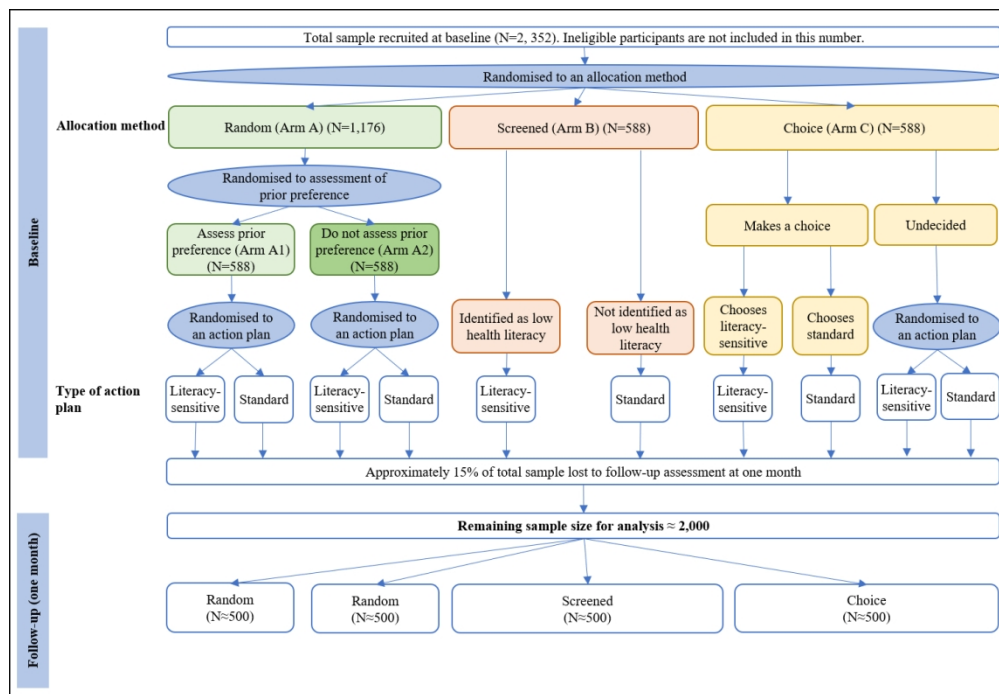

Figure 1: Anticipated participant recruitment and attrition to achieve sufficient sample size



**Smart snacking**



**Step 1: Snack moments**

Sometimes we snack because we are hungry, but there are lots of other reasons too.

Below is a list of 'snack moments.' These are times when people tend to choose unhealthy snacks or eat too much.

Choose **3** snack moments from the list that happened to you the **most often** in the **last week**.

**I often eat unhealthy snacks when...**

|                                   |                         |                             |
|-----------------------------------|-------------------------|-----------------------------|
| the snack is right in front of me | I am happy              | I have a craving            |
| someone offers me a snack         | I am sad                | I am drinking alcohol       |
| people around me are eating       | I want to reward myself | I am drinking tea or coffee |

**Step 2: Your 'key' snack moment**

Below are your top 3 snack moments.

Some snack moments will be more important than others. Choose the **1** that you would be **happiest** to change.

**I really want to change my habit of snacking when...**

|            |                       |                                   |
|------------|-----------------------|-----------------------------------|
| I am bored | I am busy or stressed | I am in front of a TV or computer |
|------------|-----------------------|-----------------------------------|

**Step 3: Make a plan**

Great! Your key snack moment is:  
Eating unhealthy snacks when I am **bored**

The last step is to come up with a plan!  
**Choose the solution that you think will work best for you.**

Drag it into the space on the right

**Items**

- go for a walk
- listen to music
- take a break
- chat to someone for 5 minutes
- drink tea

**If I want a snack because I am bored, I will...**

- 1 drink a large glass of water

**Step 4: Your plan is almost ready!**

Here is your plan so far:

If I want a snack because I am bored

then I will drink a large glass of water

Imagine how your plan might feel.  
**When do you feel bored?**  
Sometimes you might eat unhealthy snacks while you:

- wait for a friend
- take a long train or bus trip
- watch TV
- do jobs or chores you do not like

If this happens, and you want an unhealthy snack, do you think you could drink a large glass of water instead?

Figure 2: Mobile screenshots from literacy-sensitive action plan. From left to right: a) Step 1: Selecting top 3 snacking scenarios; b) Step 2: Selecting 1 key scenario; c) Step 3: Selecting a solution; d) Step 4: Imagining the plan

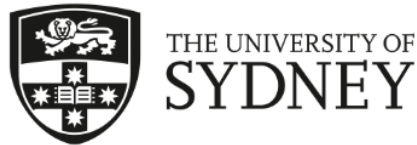

## Study Information Sheet: Smart snacking: An online planning tool

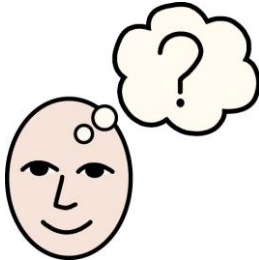

### What is the study about?

We are doing a research study to find out more about tools to help people eat less unhealthy snacks. While many of us want to change the way we snack, this can be very hard. Often we make plans but have trouble sticking to them over long periods of time. This study will look at online tools that help people stick to their plans.

### Who is carrying out the study?

We are from the School of Public Health at the University of Sydney. Our names are:

- Julie Ayre
- Carissa Bonner
- Robin Turner
- Erin Cvejic
- Kirsten McCaffery
- Stephen Walter

### What will happen if I say that I want to be in the study?

You can decide if you want to take part in the study or not. Please read this sheet carefully so that you can make up your mind about whether you want to take part. Completing a question in the online survey is an indication of your consent to take part in the study.

You may stop completing the online survey at any point if you do not wish to continue, and we will not use your answers. You do not have to give a reason for not taking part. Once you have submitted your survey anonymously, your responses cannot be withdrawn.

If you decide that you want to be in our study, we will ask you to:

1. Complete questions online (for example, about the foods you eat and snacking habits)
2. Use the online planning tool to create a plan to help you eat less unhealthy snacks. We will ask you to follow the plan for 4 weeks. You will receive 3 reminder messages about your plan during that time.
3. Complete questions online about your snacking behaviour and your plan after 4 weeks.

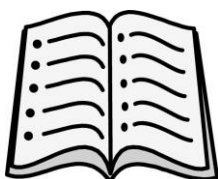

### Will anyone else know what I say in the study?

All of the information that we have about you from the study will be confidential. It will be stored in a safe place at the University of Sydney.

We will write a report about the study and show it to other people but no one will know that you were in the study.

### How long will the study take?

- The **first part** of the study will take about **20 minutes**.
- You will be asked to **try out your snacking plan** for **4 weeks**.
- The **second part** of the study (after 4 weeks) will take about **10 minutes**.

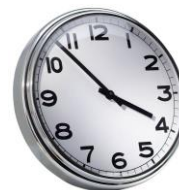

### Are there any good things about being in the study?

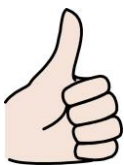

This study may help you think more about the way that you snack. This is the first step to changing your eating patterns.

### Are there any bad things about being in the study?

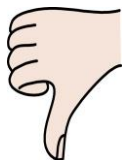

This study will take up some of your time, but we don't think it will be bad for you or cost you anything.

By giving your consent to take part in this study you are telling us that you:

- ✓ Understand what you have read.
- ✓ Agree to take part in the research study as described above.
- ✓ Agree to the use of your personal information for the research purposes described above.

### What if I want more information about the study or my involvement in it?

You can contact the researcher Julie Ayre:

- **Call:** (02) 9351 7789
- **Email:** [julie.ayre@sydney.edu.au](mailto:julie.ayre@sydney.edu.au).

### What if I am not happy with the study or the people doing the study?

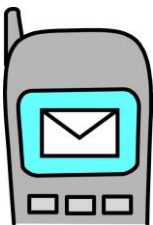

The ethical aspects of this study have been approved by the HREC of the University of Sydney [Project Number 2018/793].

If you are not happy with how we are doing the study or how we treat you, then you can:

- **Call** the university on +61 2 8627 8176 or
- Write an **email** to [human.ethics@sydney.edu.au](mailto:human.ethics@sydney.edu.au)

## ACCOUNTING FOR HEALTH LITERACY AND INTERVENTION PREFERENCES

## Supplementary Material: Behaviour Change Techniques present in intervention

**Supplementary Table 1: Behaviour Change Techniques present in intervention**

| <b>Intervention</b>       | <b>Intervention feature</b>                                         | <b>Behaviour change technique</b>            |
|---------------------------|---------------------------------------------------------------------|----------------------------------------------|
| <b>Literacy-sensitive</b> | The text 'forming plans has shown to improve snacking habits'       | Credible source                              |
|                           | Identifying situations for unhealthy snacking                       | Problem solving                              |
|                           | Identifying an alternative behaviour to enact in snacking situation | Behaviour substitution                       |
|                           | Generation of plan (with images) to reduce unhealthy snacking       | Action planning                              |
|                           | Instruction to imagine enacting the plan                            | Mental rehearsal of a successful performance |
| <b>Standard</b>           | Reminder emails                                                     | Prompts/cues                                 |
|                           | The text 'forming plans has shown to improve snacking habits'       | Credible source                              |
|                           | Identifying situations for unhealthy snacking                       | Problem solving                              |
|                           | Generation of plan to reduce unhealthy snacking                     | Action planning                              |
|                           | Reminder emails                                                     | Prompts/cues                                 |

**Note: Behaviour Change Techniques are based on the Behaviour Change Technique Taxonomy v1 (Michie et al., 2013)**

**SPIRIT 2013 Checklist: Recommended items to address in a clinical trial protocol and related documents\***

| Section / Item                    | Item Number | Description                                                                                                                                                                                                                                                                              |                              |
|-----------------------------------|-------------|------------------------------------------------------------------------------------------------------------------------------------------------------------------------------------------------------------------------------------------------------------------------------------------|------------------------------|
| <b>Administrative information</b> |             |                                                                                                                                                                                                                                                                                          |                              |
| Title                             | 1           | Descriptive title identifying the study design, population, interventions, and, if applicable, trial acronym                                                                                                                                                                             | 1                            |
| Trial registration                | 2a          | Trial identifier and registry name. If not yet registered, name of intended registry                                                                                                                                                                                                     | 3                            |
|                                   | 2b          | All items from the World Health Organization Trial Registration Data Set                                                                                                                                                                                                                 | 3<br>(available from ANZCTR) |
| Protocol version                  | 3           | Date and version identifier                                                                                                                                                                                                                                                              | 3 (As shown in ANZCTR)       |
| Funding                           | 4           | Sources and types of financial, material, and other support                                                                                                                                                                                                                              | 24                           |
| Roles and responsibilities        | 5a          | Names, affiliations, and roles of protocol contributors                                                                                                                                                                                                                                  | Role 24                      |
|                                   | 5b          | Name and contact information for the trial sponsor                                                                                                                                                                                                                                       | 1                            |
|                                   | 5c          | Role of study sponsor and funders, if any, in study design; collection, management, analysis, and interpretation of data; writing of the report; and the decision to submit the report for publication, including whether they will have ultimate authority over any of these activities | 24                           |
|                                   | 5d          | Composition, roles, and responsibilities of the coordinating centre, steering committee, endpoint adjudication committee, data management team, and other individuals or groups overseeing the trial, if applicable (see Item 21a for data monitoring committee)                         | N/A                          |
| <b>Introduction</b>               |             |                                                                                                                                                                                                                                                                                          |                              |
| Background and rationale          | 6a          | Description of research question and justification for undertaking the trial, including summary of relevant studies (published and unpublished) examining benefits and harms for each intervention                                                                                       | 4-6                          |
|                                   | 6b          | Explanation for choice of comparators                                                                                                                                                                                                                                                    | 4-5                          |

|              |   |                                                                                                                                                                                                           |     |
|--------------|---|-----------------------------------------------------------------------------------------------------------------------------------------------------------------------------------------------------------|-----|
| Objectives   | 7 | Specific objectives or hypotheses                                                                                                                                                                         | 5-6 |
| Trial design | 8 | Description of trial design including type of trial (eg, parallel group, crossover, factorial, single group), allocation ratio, and framework (eg, superiority, equivalence, noninferiority, exploratory) | 6   |

For peer review only

| <b>Methods: Participants, interventions, and outcomes</b> |     |                                                                                                                                                                                                                                                                                                                                                                                |                          |
|-----------------------------------------------------------|-----|--------------------------------------------------------------------------------------------------------------------------------------------------------------------------------------------------------------------------------------------------------------------------------------------------------------------------------------------------------------------------------|--------------------------|
| Study setting                                             | 9   | Description of study settings (eg, community clinic, academic hospital) and list of countries where data will be collected. Reference to where list of study sites can be obtained                                                                                                                                                                                             | 6-7                      |
| Eligibility criteria                                      | 10  | Inclusion and exclusion criteria for participants. If applicable, eligibility criteria for study centres and individuals who will perform the interventions (eg, surgeons, psychotherapists)                                                                                                                                                                                   | 7                        |
| Interventions                                             | 11a | Interventions for each group with sufficient detail to allow replication, including how and when they will be administered                                                                                                                                                                                                                                                     | 9-12                     |
|                                                           | 11b | Criteria for discontinuing or modifying allocated interventions for a given trial participant (eg, drug dose change in response to harms, participant request, or improving/worsening disease)                                                                                                                                                                                 | N/A                      |
|                                                           | 11c | Strategies to improve adherence to intervention protocols, and any procedures for monitoring adherence (eg, drug tablet return, laboratory tests)                                                                                                                                                                                                                              | 12<br>(reminders emails) |
|                                                           | 11d | Relevant concomitant care and interventions that are permitted or prohibited during the trial                                                                                                                                                                                                                                                                                  | N/A                      |
| Outcomes                                                  | 12  | Primary, secondary, and other outcomes, including the specific measurement variable (eg, systolic blood pressure), analysis metric (eg, change from baseline, final value, time to event), method of aggregation (eg, median, proportion), and time point for each outcome. Explanation of the clinical relevance of chosen efficacy and harm outcomes is strongly recommended | 13-14                    |
| Participant timeline                                      | 13  | Time schedule of enrolment, interventions (including any run-ins and washouts), assessments, and visits for participants. A schematic diagram is highly recommended (see Figure)                                                                                                                                                                                               | 8 (fig 1);<br>12         |
| Sample size                                               | 14  | Estimated number of participants needed to achieve study objectives and how it was determined, including clinical and statistical assumptions supporting any sample size calculations                                                                                                                                                                                          | 14-15                    |
| Recruitment                                               | 15  | Strategies for achieving adequate participant enrolment to reach target sample size                                                                                                                                                                                                                                                                                            | 6-7; 14-15               |

| <b>Methods: Assignment of interventions (for controlled trials)</b> |     |                                                                                                                                                                                                                                                                                                                                                                                                              |                          |
|---------------------------------------------------------------------|-----|--------------------------------------------------------------------------------------------------------------------------------------------------------------------------------------------------------------------------------------------------------------------------------------------------------------------------------------------------------------------------------------------------------------|--------------------------|
| <b>Allocation</b>                                                   |     |                                                                                                                                                                                                                                                                                                                                                                                                              |                          |
| Sequence generation                                                 | 16a | Method of generating the allocation sequence (eg, computer generated random numbers), and list of any factors for stratification. To reduce predictability of a random sequence, details of any planned restriction (eg, blocking) should be provided in a separate document that is unavailable to those who enrol participants or assign interventions                                                     | 7                        |
| Allocation concealment mechanism                                    | 16b | Mechanism of implementing the allocation sequence (eg, central telephone; sequentially numbered, opaque, sealed envelopes), describing any steps to conceal the sequence until interventions are assigned                                                                                                                                                                                                    | 7                        |
| Implementation                                                      | 16c | Who will generate the allocation sequence, who will enrol participants, and who will assign participants to interventions                                                                                                                                                                                                                                                                                    | 7                        |
| Blinding (masking)                                                  | 17a | Who will be blinded after assignment to interventions (eg, trial participants, care providers, outcome assessors, data analysts), and how                                                                                                                                                                                                                                                                    | 18                       |
|                                                                     | 17b | If blinded, circumstances under which unblinding is permissible, and procedure for revealing a participant's allocated intervention during the trial                                                                                                                                                                                                                                                         | N/A                      |
| <b>Methods: Data collection, management, and analysis</b>           |     |                                                                                                                                                                                                                                                                                                                                                                                                              |                          |
| Data collection methods                                             | 18a | Plans for assessment and collection of outcome, baseline, and other trial data, including any related processes to promote data quality (eg, duplicate measurements, training of assessors) and a description of study instruments (eg, questionnaires, laboratory tests) along with their reliability and validity, if known. Reference to where data collection forms can be found, if not in the protocol | 12-14                    |
|                                                                     | 18b | Plans to promote participant retention and complete follow-up, including list of any outcome data to be collected for participants who discontinue or deviate from intervention protocols                                                                                                                                                                                                                    | 12<br>(reminders emails) |
| Data management                                                     | 19  | Plans for data entry, coding, security, and storage, including any related processes to promote data quality (eg, double data entry; range checks for data values). Reference to where details of data management procedures can be found, if not in the protocol                                                                                                                                            | 18-19                    |



|                                 |     |                                                                                                                                                                                                                                                                                                                                       |                                                                      |
|---------------------------------|-----|---------------------------------------------------------------------------------------------------------------------------------------------------------------------------------------------------------------------------------------------------------------------------------------------------------------------------------------|----------------------------------------------------------------------|
| Statistical methods             | 20a | Statistical methods for analysing primary and secondary outcomes. Reference to where other details of the statistical analysis plan can be found, if not in the protocol                                                                                                                                                              | 16-18                                                                |
|                                 | 20b | Methods for any additional analyses (eg, subgroup and adjusted analyses)                                                                                                                                                                                                                                                              | 16-18                                                                |
|                                 | 20c | Definition of analysis population relating to protocol non-adherence (eg, as randomised analysis), and any statistical methods to handle missing data (eg, multiple imputation)                                                                                                                                                       | 16                                                                   |
| <b>Methods: Monitoring</b>      |     |                                                                                                                                                                                                                                                                                                                                       |                                                                      |
| Data monitoring                 | 21a | Composition of data monitoring committee (DMC); summary of its role and reporting structure; statement of whether it is independent from the sponsor and competing interests; and reference to where further details about its charter can be found, if not in the protocol. Alternatively, an explanation of why a DMC is not needed | N/A                                                                  |
|                                 | 21b | Description of any interim analyses and stopping guidelines, including who will have access to these interim results and make the final decision to terminate the trial                                                                                                                                                               | 15                                                                   |
| Harms                           | 22  | Plans for collecting, assessing, reporting, and managing solicited and spontaneously reported adverse events and other unintended effects of trial interventions or trial conduct                                                                                                                                                     | Supp (PIS)                                                           |
| Auditing                        | 23  | Frequency and procedures for auditing trial conduct, if any, and whether the process will be independent from investigators and the sponsor                                                                                                                                                                                           | N/A                                                                  |
| <b>Ethics and dissemination</b> |     |                                                                                                                                                                                                                                                                                                                                       |                                                                      |
| Research and ethics approval    | 24  | Plans for seeking research ethics committee/institutional review board (REC/IRB) approval                                                                                                                                                                                                                                             | 19                                                                   |
| Protocol amendments             | 25  | Plans for communicating important protocol modifications (eg, changes to eligibility criteria, outcomes, analyses) to relevant parties (eg, investigators, REC/IRBs, trial participants, trial registries, journals, regulators)                                                                                                      | N/A as not anticipated; however protocol updates can be as per trial |

|                               |     |                                                                                                                                                                                                                                                                                     |                  |
|-------------------------------|-----|-------------------------------------------------------------------------------------------------------------------------------------------------------------------------------------------------------------------------------------------------------------------------------------|------------------|
|                               |     |                                                                                                                                                                                                                                                                                     | registry pg<br>3 |
| Consent or assent             | 26a | Who will obtain informed consent or assent from potential trial participants or authorised surrogates, and how (see Item 32)                                                                                                                                                        | 6-7, Supp<br>PIS |
|                               | 26b | Additional consent provisions for collection and use of participant data and biological specimens in ancillary studies, if applicable                                                                                                                                               | N/A              |
| Confidentiality               | 27  | How personal information about potential and enrolled participants will be collected, shared, and maintained in order to protect confidentiality before, during, and after the trial                                                                                                | 18-19            |
| Declaration of interests      | 28  | Financial and other competing interests for principal investigators for the overall trial and each study site                                                                                                                                                                       | 22               |
| Access to data                | 29  | Statement of who will have access to the final trial dataset, and disclosure of contractual agreements that limit such access for investigators                                                                                                                                     | 19               |
| Ancillary and post-trial care | 30  | Provisions, if any, for ancillary and post-trial care, and for compensation to those who suffer harm from trial participation                                                                                                                                                       | N/A              |
| Dissemination policy          | 31a | Plans for investigators and sponsor to communicate trial results to participants, healthcare professionals, the public, and other relevant groups (eg, via publication, reporting in results databases, or other data sharing arrangements), including any publication restrictions | 18               |
|                               | 31b | Authorship eligibility guidelines and any intended use of professional writers                                                                                                                                                                                                      | N/A              |
|                               | 31c | Plans, if any, for granting public access to the full protocol, participant level dataset, and statistical code                                                                                                                                                                     | 3, 18-19         |
| <b>Appendices</b>             |     |                                                                                                                                                                                                                                                                                     |                  |
| Informed consent materials    | 32  | Model consent form and other related documentation given to participants and authorised surrogates                                                                                                                                                                                  | Supp PIS         |
| Biological specimens          | 33  | Plans for collection, laboratory evaluation, and storage of biological specimens for genetic or molecular analysis in the current trial and for future use in ancillary studies, if applicable                                                                                      | N/A              |

1  
2  
3 \*It is strongly recommended that this checklist be read in conjunction with the SPIRIT 2013 Explanation & Elaboration for important  
4 clarification on the items. Amendments to the protocol should be tracked and dated. The SPIRIT checklist is copyrighted by the SPIRIT  
5 Group under the Creative Commons “Attribution-NonCommercial-NoDerivs 3.0 Unported” license.  
6  
7  
8  
9  
10  
11  
12  
13  
14  
15  
16  
17  
18  
19  
20  
21  
22  
23  
24  
25  
26  
27  
28  
29  
30  
31  
32  
33  
34  
35  
36  
37  
38  
39  
40  
41  
42  
43  
44  
45  
46

For peer review only

# BMJ Open

## Accounting for health literacy and intervention preferences when reducing unhealthy snacking: Protocol for an online randomized controlled trial

|                                 |                                                                                                                                                                                                                                                                                                                                                                                                                                                                                                                                                                                                                                                                                                                                                                                        |
|---------------------------------|----------------------------------------------------------------------------------------------------------------------------------------------------------------------------------------------------------------------------------------------------------------------------------------------------------------------------------------------------------------------------------------------------------------------------------------------------------------------------------------------------------------------------------------------------------------------------------------------------------------------------------------------------------------------------------------------------------------------------------------------------------------------------------------|
| Journal:                        | <i>BMJ Open</i>                                                                                                                                                                                                                                                                                                                                                                                                                                                                                                                                                                                                                                                                                                                                                                        |
| Manuscript ID                   | bmjopen-2018-028544.R2                                                                                                                                                                                                                                                                                                                                                                                                                                                                                                                                                                                                                                                                                                                                                                 |
| Article Type:                   | Protocol                                                                                                                                                                                                                                                                                                                                                                                                                                                                                                                                                                                                                                                                                                                                                                               |
| Date Submitted by the Author:   | 18-Apr-2019                                                                                                                                                                                                                                                                                                                                                                                                                                                                                                                                                                                                                                                                                                                                                                            |
| Complete List of Authors:       | Ayre, Julie; The University of Sydney, Faculty of Medicine and Health, Sydney School of Public Health, Sydney Health Literacy Lab<br>Cvejic, Erin; The University of Sydney, Faculty of Medicine and Health, Sydney School of Public Health, Sydney Health Literacy Lab<br>Bonner, Carissa; The University of Sydney, Faculty of Medicine and Health, Sydney School of Public Health, Sydney Health Literacy Lab<br>Turner, Robin ; University of Otago, Division of Health Sciences, Biostatistics Unit<br>Walter, Stephen ; McMaster University , Faculty of Health Sciences, Department of Health Research Methods, Evidence and Impact<br>McCaffery, Kirsten; The University of Sydney, Faculty of Medicine and Health, Sydney School of Public Health, Sydney Health Literacy Lab |
| <b>Primary Subject Heading</b>: | Public health                                                                                                                                                                                                                                                                                                                                                                                                                                                                                                                                                                                                                                                                                                                                                                          |
| Secondary Subject Heading:      | Diabetes and endocrinology                                                                                                                                                                                                                                                                                                                                                                                                                                                                                                                                                                                                                                                                                                                                                             |
| Keywords:                       | General diabetes < DIABETES & ENDOCRINOLOGY, PREVENTIVE MEDICINE, PUBLIC HEALTH                                                                                                                                                                                                                                                                                                                                                                                                                                                                                                                                                                                                                                                                                                        |
|                                 |                                                                                                                                                                                                                                                                                                                                                                                                                                                                                                                                                                                                                                                                                                                                                                                        |

SCHOLARONE™  
Manuscripts

## ACCOUNTING FOR HEALTH LITERACY AND INTERVENTION PREFERENCES

Title

Accounting for health literacy and intervention preferences  
when reducing unhealthy snacking: Protocol for an online  
randomized controlled trial

Julie Ayre<sup>1\*</sup>, Erin Cvejic<sup>2</sup>, Carissa Bonner<sup>1</sup>, Robin M Turner<sup>3</sup>, Stephen D Walter<sup>4</sup>, Kirsten J McCaffery<sup>1</sup>

<sup>1</sup>The University of Sydney, Faculty of Medicine and Health, School of Public Health, Sydney Health Literacy Lab, NSW, Australia

<sup>2</sup>The University of Sydney, Faculty of Medicine and Health, School of Public Health, NSW, Australia

<sup>3</sup>University of Otago, Division of Health Sciences, Biostatistics Unit

<sup>4</sup>McMaster University, Faculty of Health Sciences, Department of Health Research Methods, Evidence, and Impact

\* Corresponding author

E-mail: [julie.ayre@sydney.edu.au](mailto:julie.ayre@sydney.edu.au)

## ACCOUNTING FOR HEALTH LITERACY AND INTERVENTION PREFERENCES

## Abstract

### Introduction

Health literacy describes the cognitive and social skills that individuals use to access, understand and act on health information. Health literacy interventions typically take the ‘universal precautions approach’ where all consumers are presented with simplified materials. Although this approach can improve knowledge and comprehension, its impact on complex behaviours is less clear. Systematic reviews also suggest health literacy interventions underutilise volitional strategies (such as planning) that play an important role in behaviour change. A recent study found volitional strategies may need to be tailored to the participant’s health literacy. The current study aims to replicate these findings in a sample of people who have diabetes and/or are overweight or obese as measured by BMI, and to investigate the most effective method of allocating an action plan to a participant to reduce unhealthy snacking.

### Methods and analysis

We plan to recruit approximately 2,400 participants at baseline. Participants will receive one of two alternative online action plans intended to reduce unhealthy snacking (‘standard’ action plan or ‘literacy-sensitive’ action plan). Participants will be randomised to a method of allocation to an action plan: 1) random allocation; 2) allocation by health literacy screening tool; or 3) allocation by participant selection. Primary outcome is self-reported serves of unhealthy snacks during the previous month. Multiple linear regression will evaluate the impact of health literacy on intervention effectiveness. The analysis will also identify independent contributions of each action plan, method of allocation, health literacy, and participant selections on unhealthy snacking at 4-week follow-up.

## ACCOUNTING FOR HEALTH LITERACY AND INTERVENTION PREFERENCES

**Ethics and dissemination**

This study was approved by the University of Sydney Human Research Ethics Committee [2017/793] and is registered with Australian New Zealand Clinical Trials Registry: ACTRN12618001409268p. Findings will be disseminated through peer-reviewed international journals, conferences and updates with collaborating public health bodies (Diabetes NSW & ACT, and Western Sydney Local Health District).

**Article Summary****Strengths and limitations of this study**

- The impact of literacy-sensitive design on the effectiveness of an action plan intervention to reduce unhealthy snacking in a sample of people with diverse health literacy levels will be evaluated.
- The analysis will isolate the effects of each action plan intervention (standard and literacy-sensitive) from the effects of allocation method (random, screened or choice), the participant's health literacy (as categorised using the screening tool) and the effect of providing a choice of interventions.
- Free-text plans in this study will undergo content analysis to assess the quality of plans created by people with higher and lower health literacy.
- The impact of assessing participant preference prior to random allocation to an intervention on outcomes will also be explored.
- This study uses a subjective outcome measure (self-reported monthly unhealthy snacking collected at a single time-point) rather than an objective measure (e.g. unhealthy snacking observed throughout the month-long period) or more frequently

## ACCOUNTING FOR HEALTH LITERACY AND INTERVENTION PREFERENCES

reported subjective measure, and has a relatively short follow-up period; these aspects may limit the study findings.

## Introduction

Health literacy describes the cognitive and social skills that enable individuals to access, understand and act on health information (1). Low health literacy is increasingly recognised as an important contributor to health inequality and is associated with increased hospitalization, mortality, prevalence of chronic disease and risk factors for health conditions (2). Low health literacy is common worldwide, with estimates ranging from 36 – 60% of the population in Australia, Europe and the US (3-5).

Current approaches to address health literacy issues have focused on providing all consumers, regardless of their health literacy level, with health information that is easy to process and understand (2, 6). Whilst this ‘universal precautions approach’ has been shown to improve health knowledge, it is less clear whether it is effective for improving complex behaviours such as healthy eating and increased physical activity (2, 7, 8). This may reflect the fact that health literacy guidelines and interventions place relatively little emphasis on strategies that promote action, such as planning, self-monitoring or problem solving (9-13). These kinds of strategies are increasingly recognised as key components of lifestyle interventions (14); furthermore, there has been little research investigating how they could be adapted for audiences with lower health literacy.

A recent randomized control trial (RCT) has investigated the effects of literacy-sensitive design on action plans to reduce unhealthy snacking behaviour (15). This design incorporated health literacy strategies (e.g. simple language) and separated the planning process into



## ACCOUNTING FOR HEALTH LITERACY AND INTERVENTION PREFERENCES

1  
2  
3 distinct steps to reduce cognitive demands. This ‘literacy-sensitive’ action plan was compared  
4  
5 to action plan instructions that have been used in samples of the general population (16). The  
6  
7 results from this study suggested that people with lower health literacy reported consuming  
8  
9 fewer unhealthy snacks at follow-up when they had used the literacy-sensitive action plan,  
10  
11 whereas people with higher health literacy reported consuming fewer unhealthy snacks using  
12  
13 the ‘standard’ action plan (15).  
14  
15

16  
17  
18 The current study will build on these findings by evaluating the most effective way to  
19  
20 determine the best action plan for participants. One obvious approach is to allocate an action  
21  
22 plan based on a participant’s health literacy score. Alternatively, participants could be asked  
23  
24 to select the plan they would prefer to follow. Although allowing the participant to choose  
25  
26 their plan might less accurately match a participant to an action plan that meets their health  
27  
28 literacy needs, there are some potential additional advantages to this approach. For example,  
29  
30 participants would be able to factor in other relevant aspects (such as their motivation to  
31  
32 engage with the planning process) (17), and presenting participants with different options  
33  
34 may also encourage greater satisfaction with the intervention (18). This is further supported  
35  
36 by evidence that the effects of interventions in randomized controlled trials may be increased  
37  
38 when participants receive their preferred intervention (19).  
39  
40  
41  
42  
43

44  
45 This study has three key aims. Firstly, this study aims to evaluate the impact of health literacy  
46  
47 and a literacy-sensitive action plan on unhealthy snacking in a sample of people with type 2  
48  
49 diabetes and/or overweight or obese BMI. In doing so this study aims to replicate previous  
50  
51 findings in a clinical sample (15). Unhealthy snacking in this study includes consumption of  
52  
53 discretionary foods as described in the Australian Guidelines to Healthy Eating (20). For the  
54  
55 purposes of this study, this included sugar-sweetened beverages and excluded alcoholic  
56  
57 beverages.  
58  
59  
60

## ACCOUNTING FOR HEALTH LITERACY AND INTERVENTION PREFERENCES

1  
2  
3 The second aim is to evaluate how the *method of allocation* to either intervention (literacy-  
4 sensitive or standard action plan) affects the overall effectiveness of the intervention. Three  
5 methods of allocation will be evaluated: 1) random allocation to an action plan; 2) allocation  
6 to an action plan based on individual health literacy; or 3) allowing participants to choose  
7 which action plan they use. This study will employ a two-stage randomization (Rucker)  
8 design (21). This design allows estimation of the effects of each action plan on outcomes (the  
9 treatment effect), independent of the effects of a person receiving their preferred treatment  
10 (preference effect) and the effects of self-selection (selection effect). This is the only  
11 preference trial design that allows this delineation of all these effects (22).

12  
13  
14  
15  
16  
17  
18  
19  
20  
21  
22  
23  
24  
25 The third aim is to evaluate whether assessment of participant preference for an intervention  
26 prior to random allocation influences the effectiveness of the intervention. This addresses an  
27 unanswered question in research on the effects of treatment preference on study outcomes  
28 i.e., does assessment of preference introduce a methodological artefact by increasing the  
29 salience of discrepancies between an individual's preferred and received treatments and in  
30 doing so, have a negative effect on intervention outcomes (22)?

31  
32  
33  
34  
35  
36  
37  
38  
39  
40 We hypothesise that:

- 41  
42  
43 1. A literacy-sensitive action plan will be more effective at reducing unhealthy snacking for  
44 participants with lower health literacy, whereas the standard action plan will be more  
45 effective for participants with higher health literacy.
  - 46  
47  
48 2. The intervention will be more effective at reducing unhealthy snacking for participants  
49 who are allocated an action plan using the health literacy screening tool compared to those  
50 who are asked to select their preferred action plan. Both of these allocation methods will be  
51 more effective than random allocation to an action plan.
- 52  
53  
54  
55  
56  
57  
58  
59  
60

## ACCOUNTING FOR HEALTH LITERACY AND INTERVENTION PREFERENCES

1  
2  
3 3. Assessing preference will negatively impact plan effectiveness, an effect which will be  
4 greater for those who are randomised to the plan which is discordant with their preference.  
5  
6  
7  
8  
9

## 10 Methods and analysis

### 11 Study Design

12  
13 The design is a three parallel-arm online RCT to test the effect of health literacy, type of  
14 action plan, and method of allocation to an action plan on self-reported unhealthy snacking  
15 behaviour. The three methods of allocation are 1) random 2) use of a health literacy screening  
16 tool to allocate participants one of the two action plans ('screened' arm) and 3) participant  
17 choice of action plan ('choice' arm). This study will also evaluate whether the process of  
18 assessing preference for a particular action plan prior to randomisation will have an impact on  
19 subsequent self-reported snacking behaviour. A schematic representation of the study design  
20 is shown in Figure 1.  
21  
22  
23  
24  
25  
26  
27  
28  
29  
30  
31  
32

### 33 Participants and recruitment

34  
35 The proposed study will seek to recruit 2,352 Australian participants with type 2 diabetes.  
36  
37 Participants will be recruited through an online market research company, Dynata, which has  
38 a pool of approximately 10,000 Australians with type 2 diabetes. This sample will be  
39 supplemented with additional participants from Dynata who have self-reported height and  
40 weight corresponding to an overweight or obese BMI (i.e.,  $BMI \geq 25 \text{ kg/m}^2$ ). Participants  
41 will be eligible to participate if they are registered with DynataI's Australian registry, are  
42 over 18 years of age (adult population), and self-report that they have type 2 diabetes or self-  
43 report a height and weight that correspond to overweight or obese BMI. Participants will be  
44 excluded if they do not speak English. Participants will not be excluded on the basis of their  
45 snacking behaviour. Recruitment commenced February 14<sup>th</sup>, 2019.  
46  
47  
48  
49  
50  
51  
52  
53  
54  
55  
56  
57  
58  
59  
60

## ACCOUNTING FOR HEALTH LITERACY AND INTERVENTION PREFERENCES

1  
2  
3 Participants who click the link received from Dynata will be presented with a brief  
4  
5 introduction to the study and a link to the Participant Information Sheet (see Supplementary  
6  
7 File 1). Informed consent will be indicated by completion of the online survey, as outlined in  
8  
9 the Participant Information Sheet. On the next page, participants then begin the baseline  
10  
11 survey.  
12  
13  
14

### 15 Patient and public involvement

16  
17 Patients and public were not directly involved in development of the research question,  
18  
19 however, consumer health representatives living with type 2 diabetes were consulted for  
20  
21 feedback at multiple stages of intervention and study development, including: intervention  
22  
23 instructions, the appropriateness of the literacy sensitive plans, and the ease with which  
24  
25 feedback at follow-up could be communicated. Participants in the trial are able to indicate if  
26  
27 they are interested in receiving a lay summary of the study results which will be disseminated  
28  
29 through email by Dynata (further maintaining participants anonymity). We will also assess  
30  
31 participant burden and acceptability using the pilot data. Lastly, participants will be able to  
32  
33 provide feedback on the perceived burden of the intervention using free text fields during the  
34  
35 follow-up survey.  
36  
37  
38  
39  
40  
41

### 42 Participant allocation

43  
44 After completing baseline measures participants will be randomised to one of three allocation  
45  
46 methods using the 'Survey Flow' and 'Randomiser' functions included in the survey platform  
47  
48 (Qualtrics) (Figure 1). The 'Randomiser' is based on the Mersenne Twister, a pseudorandom  
49  
50 number generator. This allocation method will determine how the planning tool (either  
51  
52 literacy-sensitive or standard) is assigned to the participant. Participants in the random arm  
53  
54 will be unaware of their allocation method. At baseline, only the participants in the choice  
55  
56 arm and those who are randomised to assess prior preference in the random arm will be aware  
57  
58  
59  
60

ACCOUNTING FOR HEALTH LITERACY AND INTERVENTION PREFERENCES

of the two different tool versions. Participants in the screened arm will be aware that there is more than one tool available.

For peer review only

## ACCOUNTING FOR HEALTH LITERACY AND INTERVENTION PREFERENCES

1  
2  
3 [Figure 1 here]  
4

5 **Figure 1: Anticipated participant recruitment and attrition to achieve sufficient sample size**  
6  
7  
8  
9  
10  
11  
12  
13  
14  
15  
16  
17  
18  
19  
20  
21  
22  
23  
24  
25  
26  
27  
28  
29  
30  
31  
32  
33  
34  
35  
36  
37  
38  
39  
40  
41  
42  
43  
44  
45  
46

For peer review only

## ACCOUNTING FOR HEALTH LITERACY AND INTERVENTION PREFERENCES

*Allocation method*

1. **Random (Arm A):** Participants randomised to the ‘random’ arm will be further randomised to either 1) assess their prior preferences (i.e. their preferred action plan; Arm A1), and then randomised to the standard or literacy-sensitive action plan; or 2) randomised to the standard or literacy-sensitive action plan without assessment of prior preferences (Arm A2; Figure 1). Prior preference will be measured using the same format as in the ‘participant choice’ arm (Arm C) with additional text stating that participants may not receive their preferred tool.
2. **Screened (Arm B):** Allocation is based on assessment of health literacy using the Newest Vital Sign (NVS) measure (23). The literacy-sensitive action plan will be allocated to those scoring less than 4 (indicative of inadequate health literacy), and the standard action plan will be allocated to the remaining participants. Participants will be told that, based on their responses, the researchers have selected an action plan tool that is most suitable for them.
3. **Choice (Arm C):** Participants will be provided with a brief description of the action plans and select the plan they want to use. The literacy-sensitive intervention is described in simple language whereas the standard intervention is described using more complex words (e.g. ‘tailored plan that suits your specific situation’ vs ‘simple plan using common ways to eat less snacks’). It is anticipated that the difference in language complexity will help participants select the most appropriate tool for their health literacy level by giving an indirect indication of the relative level of cognitive effort required, in addition to the explicit descriptions which describe the relatively greater cognitive effort required in the standard plan. Order of presentation of the two plans is randomised. In the first instance, participants have the option of selecting ‘Unsure’ to allow for undecided

## ACCOUNTING FOR HEALTH LITERACY AND INTERVENTION PREFERENCES

participants. Participants will then be presented with an alternative description of the study and asked again to make a choice. Participants will be informed that if they select 'Unsure' again, the researchers will select a plan for them. In doing so, participants will be randomised to an action plan as per Rucker protocol (21).

*Action plan interventions*

Either a literacy-sensitive or standard action plan will be allocated to participants. The text used in each tool is presented below:

**Literacy-sensitive action plan (“Smart Snacking 101 (basic)”):** This commences with the text: “We want you to plan how you will change your unhealthy snacking behaviour each day because forming plans has been shown to improve snacking habits”. The intervention consists of 4 steps that guide the participant through the process of developing an appropriate plan (also shown in Figure 2):

1. Step 1: Sometimes we snack because we are hungry, but there are lots of other reasons. Think about your snacks in the last week. Below is a list of ‘snack moments.’ These are times when people tend to choose unhealthy snacks or eat too much. Choose 3 snack moments from the list that happened to you the most often in the last week. [Participants selects from list of snack moments].
2. Step 2: Below are your top 3 snack moments. Some snack moments will be more important than others. Choose the 1 that you would be happiest to change. [Participant chooses from 3 previously selected snack moments]
3. Step 3: Great! Your most important snack moment was snacking because you are [example snack moment: bored]. The last step is to come up with a plan! Choose the solution that you think will work best for you. Drag it into the space on the right. [Participants selects from list of solutions]



## ACCOUNTING FOR HEALTH LITERACY AND INTERVENTION PREFERENCES

- 1  
2  
3  
4  
5  
6  
7  
8  
9  
10  
11  
12  
13  
14  
15
4. Step 4: Imagine how your plan might feel. [examples of scenarios when this might happen]. The final step is to make sure the plan is realistic. How hard do you think it will be to do this plan for the next month [Slider options range from very easy (1) to very hard (10). If the participant selects a number greater than or equal to 7 they will be prompted to revise the plan]

16 [Figure 2 here]

17  
18  
19 **Figure 2: Mobile screenshots from *literacy-sensitive action plan*. From left to right: a)**  
20 **Step 1: Selecting top 3 snacking scenarios; b) Step 2: Selecting 1 key scenario; c) Step 3:**  
21 **Selecting a solution; d) Step 4: Imagining the plan**  
22  
23  
24  
25  
26  
27  
28  
29

30 **Standard action plan (“Smart Snacking Pro (advanced)”):** Participants receive the  
31 following instructions: “We want you to plan how you will change your unhealthy snacking  
32 behaviour each day, because forming plans has been shown to improve snacking habits. You  
33 are free to choose how you do this but we want you to formulate your plans in as much detail  
34 as possible. Pay attention to the situations in which you will implement (carry out) these  
35 plans. Focus on situations when you are not hungry but find yourself snacking. Please enter  
36 your situations and your plans below.”  
37  
38  
39  
40  
41  
42  
43  
44  
45  
46

47 After completing either action plan participants will be presented with their plan for a final  
48 time and instructed to write down, take a screenshot or make a copy of it. Participants will  
49 also be asked to confirm that they have a copy of the plan. We have incorporated behaviour  
50 change techniques into each intervention. These are described in detail in the Supplementary  
51 File 2.  
52  
53  
54  
55  
56  
57  
58  
59  
60

## ACCOUNTING FOR HEALTH LITERACY AND INTERVENTION PREFERENCES

*Baseline and follow-up surveys*

At baseline participants will complete demographic questions and measures of health literacy. They will then receive information about general reasons for reducing *unhealthy* snacking (such as avoiding weight gain), reasons for ‘smart snacking’ (i.e. choosing healthy snacks), definitions of healthy and unhealthy snacks (low and high in: kilojoules, fat, salt and sugars, respectively), and examples from each category. Participants then complete measures of snacking behaviour, habit strength (concerning consumption of unhealthy snacks), and intentions to reduce unhealthy snacking. Intention to reduce unhealthy snacking will be measured again, immediately after creating the plan. Participants will be emailed a reminder of their personal plan at baseline (within the first week), and before then end of the 2nd and 3rd weeks to increase compliance and retention. Consistent with our previous study, in which a change in snacking scores was detected as a result of the intervention after 4 weeks (15), participants in this study will also complete a follow-up survey after 4 weeks. In addition, the 4-week period was selected as it is a tangible time period over which participants can recall their behaviour, and the instrument for the primary outcome has been validated for recall over the previous month (20). The follow-up survey consists of the same description of reasons to reduce unhealthy snacking and definition, followed by measures of snacking behaviour, habit strength and intention. Action control will also be measured in the follow-up survey.

**Measures***Screening measures*

Prior to beginning the survey, participants will be asked to indicate whether they have type 2 diabetes, and to provide their height (cm or feet and inches) and weight (kg).

## ACCOUNTING FOR HEALTH LITERACY AND INTERVENTION PREFERENCES

*Demographic measures*

Participants will be asked to complete questions about their age, employment status, highest level of educational attainment, and, if they report having diabetes, years since diagnosis and whether or not they use insulin.

*Health literacy*

Health literacy will be measured using the Newest Vital Sign (NVS)(23), a 6-item measure of functional health literacy, and a single-item literacy screener (24). NVS scores of 0-1 indicate a high likelihood of limited healthy literacy, scores of 2-3 indicate the possibility of limited health literacy and scores of 4-6 indicate adequate health literacy.

*Need for cognition*

Need for cognition describes the extent that an individual engages in and enjoys cognitively effortful activities (i.e. activities that require a lot of thinking) (25). Three items on a 7-point likert scale (strongly disagree to strongly agree) will assess the participant's need for cognition (26).

*Primary outcome**Snack scores (previous month)*

Snacking scores will be measured using a validated 7-item measure based on a diet score developed by the Commonwealth Scientific and Industrial Research Organisation (CSIRO) (20). Items are drawn from the 'discretionary foods' category which the Australian Guidelines to Healthy Eating define as foods 'not considered necessary for a healthy diet'.

Alcohol was excluded from the assessment in this study as the focus is on 'snacks.'

Participants answer how many serves of unhealthy snacks they ate in the past month.

Participants can answer according to the number of serves per day, week or month. Average weekly serves of unhealthy snacks will be calculated from these scores. Although electronic diaries might overcome some limitations of once-off measures of snacking behaviour such as

## ACCOUNTING FOR HEALTH LITERACY AND INTERVENTION PREFERENCES

that described above, electronic diaries were unavailable at the time of study development due to the budget and technical constraints. This approach chosen also reduces participant burden and minimises the risk of missing data.

*Secondary outcomes**Perceived unhealthy/healthy snacking (previous week)*

Two items, each on a 7-point Likert scale will assess perceived extent of healthy and unhealthy snacking in the previous week, respectively. Healthy snacks are described to participants as those that are low in kilojoules, fat, salt and sugars. Unhealthy snacks are described as high in kilojoules, fat, salt and sugars. Examples of healthy and unhealthy snacks are provided.

*Intention, habit strength and action control*

The measure of intention consists of 3 items that ask about the participant's intention to reduce unhealthy snacking (27, 28). Habit strength will be assessed using the 12-item self-report habit strength index (29), and action control will be assessed using a 6-item measure (30). Responses to each item are recorded on 7-point Likert scales (strongly disagree to strongly agree).

*Difficulty using the planning tool*

A single item will ask participants to rate how hard it was to use the planning tool (1=not at all hard, 5=extremely hard).

*Preferred action plan at follow-up*

At follow-up, participants will be reminded of the name and logo used for their plan.

Participants will be shown an image slider that contains screenshots from the other action plan. Participants will then be asked: "If you were given the choice, which action plan would you prefer to use next time?"

## ACCOUNTING FOR HEALTH LITERACY AND INTERVENTION PREFERENCES

## Sample size

The proposed study will seek to analyse a sample of 2,000 Australian participants at follow-up with high BMI (overweight/obese) and/or type 2 diabetes. At baseline participants will be randomised at a ratio of 2:1:1 to each allocation method arm, such that there are a total of 1,000 participants in the random arm (who will then be evenly randomised to assess or not assess their preference for a particular action plan before they are ultimately randomised to an action plan), and 500 in the two remaining allocation method arms (the screened and choice arms). With a two sided alpha of 0.05 and power of 80%, a sample of this size will allow us to detect a small main effect of  $f = 0.08$  in a univariate ANOVA comparing the three allocation method arms and in a univariate ANOVA comparing the two prior-preference assessment arms; this corresponds to a minimum pairwise difference between the two most extreme mean values of approximately 0.18 standard deviations. Estimates of effect size are based on the outcome of previous work exploring the effects of action plans on unhealthy snacking (15).

Based on our previous studies recruiting through this provider, we anticipate an attrition rate no greater than 15% by one month follow-up. Therefore, we estimate a total of 2,352 should be recruited at baseline to ensure sufficient sample size for analysis.

A sample of this size will also ensure that there is at least 80% power for secondary analysis conducted to estimate treatment and preference effects (20, 31) with a treatment effect between the two interventions (literacy-sensitive and standard planning tools) as small as 0.25 standard deviations (estimated as 5 snacks per month based on previous findings (15)), and a preference effect, comparing those who received their preferred tool to those who did not, as small as 0.35 standard deviations (approximately 7 snacks per month). This assumes that approximately equal proportions of participants will choose the literacy-sensitive and

## ACCOUNTING FOR HEALTH LITERACY AND INTERVENTION PREFERENCES

standard planning tools in the choice arm, and that there will be approximately equal proportions of participants allocated to each of these interventions in the screened arm.

### Piloting

The intervention will be piloted with 200 participants to check that approximately equal numbers of participants allocated to the choice condition select each of the interventions. If required, sample size estimates will be adjusted to ensure that the study is sufficiently powered. Piloting will also allow us to assess participant burden and intervention acceptability.

### Analysis:

Follow-up outcome measures for participants who do not complete the follow-up survey will be estimated for worst-case (no change in snacking score) and best-case scenarios (average-change in snack score). These estimates will be incorporated as an intention-to-treat analysis. Baseline characteristics of completers and non-completers will be compared to assess bias and generalisability.

### *Confirmatory analysis*

A confirmatory analysis will replicate the analysis previously reported (15) to examine if the treatment effect is modified by health literacy. Multiple linear regression models including an intervention group  $\times$  health literacy (NVS score) interaction term will be used to predict follow-up snacking scores and perceived difficulty using the plan. Important correlates of health literacy (age, level of education, language spoken at home) (2), diabetes status and baseline snacking will be controlled for in the model. NVS scores will be examined both continuously and categorically (i.e., inadequate vs. adequate health literacy).

## ACCOUNTING FOR HEALTH LITERACY AND INTERVENTION PREFERENCES

*Assessment of prior preference analysis*

For participants in the random arm of the study, participants whose action plan preference was assessed prior to randomisation to an intervention will be compared to those whose preference was not assessed. Multiple linear regression (controlling for health literacy, age, level of education, language spoken at home and baseline snacking) will evaluate the effect of preference assessment on unhealthy snacking behaviour. For participants who provided a preference, an additional multiple linear regression will evaluate the effect of participants receiving their preferred intervention compared to those not receiving their preferred intervention on unhealthy snacking behaviour.

*Analysis of effects of allocation method*

The primary analysis will use regression to test for a difference in self-reported unhealthy snacking between the three randomised arms (random, screened, and choice) whilst adjusting for any effect of diabetes status. An adjusted model will also be constructed to allow for any baseline imbalances in the potential confounders including age, English as a second language, level of education. The analysis will be repeated on the secondary outcomes of perceived unhealthy snacking in the previous week, snacks consumed the previous day, difficulty using the planning tool, action control, and habit strength with similar adjustment for diabetes status and any baseline imbalances. A sub-analysis will also be conducted on participants with and without type 2 diabetes.

An appropriate analysis that uses the available preference information will be used to estimate treatment, preference and selection effects for the primary outcome (32). The treatment effect compares the efficacy of the health literate action plan with the standard action plan in the random arm. The preference effect and selection effects are estimated using the random and choice arms. The preference effect measures the difference in self-reported

## ACCOUNTING FOR HEALTH LITERACY AND INTERVENTION PREFERENCES

1  
2  
3 unhealthy snacking for those who received their preferred action plan compared to those who  
4  
5 did not receive their preferred action plan. The selection effect measures the difference  
6  
7 between those who would select the literacy-sensitive intervention with those who would  
8  
9 select the standard intervention regardless of which intervention they received. Secondary  
10  
11 analyses will adjust for diabetes status, and baseline imbalances in potential confounders  
12  
13 including age, English as a second language, level of education. Data from participants in the  
14  
15 screened arm will also be analysed in this manner, producing estimates analogous to the  
16  
17 preference and selection effects.  
18  
19  
20

21  
22  
23 These effects will also be estimated for the secondary outcomes of perceived unhealthy  
24  
25 snacking in the previous week, snacks consumed the previous day, difficulty using the  
26  
27 planning tool, action control, and habit strength with similar adjustment for diabetes status  
28  
29 and any baseline imbalances.  
30  
31

32  
33 Bootstrapping, by taking repeated random samples with replacement, will be used to estimate  
34  
35 the difference between the preference effect (estimated using choice arm) and an analogous  
36  
37 effect estimated using the screened arm, as well as the difference between the selection effect  
38  
39 (estimated using the choice arm) and an analogous effect estimated using the screened arm.  
40  
41

42  
43 Bootstrapping will also be used to estimate the confidence intervals for non-continuous  
44  
45 outcome measures. The bootstrapping is necessary, as the variances for the estimated  
46  
47 differences and non-continuous outcomes have not been derived previously (33).  
48  
49

#### 50 *Additional analysis*

51  
52 Two researchers will also independently code standard action plans to indicate the extent that  
53  
54 participants followed standard action plan instructions (that is, provided at least one  
55  
56 ‘situation’, and one ‘plan’) and the extent that plans differed from the pre-determined options  
57  
58 presented in the literacy-sensitive action plans (for example, situations or solutions that did  
59  
60



## ACCOUNTING FOR HEALTH LITERACY AND INTERVENTION PREFERENCES

not correspond to options listed in the literacy-sensitive action plan, or strategies that fell outside of the “If-then” construction. The latter may include, for example, making sure healthy snacks are prepared in advance, or refraining from buying certain foods at the supermarket). Coders will be blind to the health literacy level of participants. Any disagreements will be systematically resolved through discussion. Results from this content analysis will also inform a secondary analysis of the impact of allocation method and action plan on snacking scores.

### Data management

De-identified data will be captured electronically on the secure Qualtrics server. Data will be stored securely in de-identified form, with a unique participant ID to link responses from the baseline and follow-up surveys. In all forms of dissemination, only de-identified data will be presented as group means and differences to maintain the anonymity of participants. In line with National Health and Medical Research Council (NHMRC) recommendations, and University of Sydney policies, all data will be kept for a minimum 5 years.

### Ethics and dissemination

This study was approved by the University of Sydney Human Research Ethics Committee [2017/793]. The interventions used in this study are practical; they can be easily incorporated into existing self-management practices, particularly with the use of online technologies, and are low in cost. Ascertaining an effective way to tailor planning tools to health literacy level (that is, allowing the participant to choose by employing a screening tool) will provide valuable information for implementation in apps that target people with varying health literacy levels. Findings from this study will be disseminated through peer-reviewed publication and national and international conference presentations. Findings will also be

## ACCOUNTING FOR HEALTH LITERACY AND INTERVENTION PREFERENCES

1  
2  
3 disseminated through community and research partnerships with groups such as Western  
4  
5 Sydney Diabetes.  
6  
7  
8  
9  
10  
11  
12  
13  
14  
15  
16  
17  
18  
19  
20  
21  
22  
23  
24  
25  
26  
27  
28  
29  
30  
31  
32  
33  
34  
35  
36  
37  
38  
39  
40  
41  
42  
43  
44  
45  
46  
47  
48  
49  
50  
51  
52  
53  
54  
55  
56  
57  
58  
59  
60

For peer review only

## ACCOUNTING FOR HEALTH LITERACY AND INTERVENTION PREFERENCES

## Full references

1. Nutbeam D. Health literacy as a public health goal: a challenge for contemporary health education and communication strategies into the 21st century. *Health promotion international*. 2000;15(3):259-67.
2. Berkman ND, Sheridan SL, Donahue KE, Halpern DJ, Viera AJ, Crotty K, et al. Health literacy interventions and outcomes: An updated systematic review. *Evidence report/technology assessment*. 2011(199):1-941.
3. Australian Bureau of Statistics. Health Literacy, Australia, cat. no.4233.0. In: Statistics ABo, editor. Canberra: Australian Bureau of Statistics; 2006.
4. Kutner M, Greenburg E, Jin Y, Paulsen C. The Health Literacy of America's Adults: Results from the 2003 National Assessment of Adult Literacy. NCES 2006-483. National Center for Education Statistics. 2006.
5. World Health Organisation. In: Kickbush I, Pelikan JM, Apfel F, Tsouros AD, editors. *Health literacy: the solid facts*. 2013.
6. Meppelink CS, Smit EG, Diviani N, Van Weert JCM. Health Literacy and Online Health Information Processing: Unraveling the Underlying Mechanisms. *Journal of Health Communication*. 2016;21(sup2):109-20.
7. Sheridan SL, Halpern DJ, Viera AJ, Berkman ND, Donahue KE, Crotty K. Interventions for Individuals with Low Health Literacy: A Systematic Review. *Journal of Health Communication*. 2011;16(sup3):30-54.
8. Bailey SC, Brega AG, Crutchfield TM, Elasy T, Herr H, Kaphingst K, et al. Update on health literacy and diabetes. *Diabetes Educ*. 2014;40(5):581-604.
9. Schwarzer R. Modeling Health Behavior Change: How to Predict and Modify the Adoption and Maintenance of Health Behaviors. *Applied Psychology*. 2008;57(1):1-29.

## ACCOUNTING FOR HEALTH LITERACY AND INTERVENTION PREFERENCES

10. Hagger MS, Chatzisarantis NLD. An Integrated Behavior Change Model for Physical Activity. *Exercise and Sport Sciences Reviews*. 2014;42(2):62-9.
11. Brega A, Barnard J, Mabachi N, Weiss B, DeWalt D, Brach C, et al. AHRQ Health Literacy Universal Precautions Toolkit, 2nd Edition Rockville, MD: Agency for Healthcare Research and Quality; 2015 [updated February 2015. Available from: <http://www.ahrq.gov/professionals/quality-patient-safety/quality-resources/tools/literacy-toolkit/healthlittoolkit2.html>.
12. Kim SH, Lee A. Health-Literacy-Sensitive Diabetes Self-Management Interventions: A Systematic Review and Meta-Analysis. *Worldviews on Evidence-Based Nursing*. 2016;13(4):324-33.
13. Schaffler J, Leung K, Tremblay S, Merdsoy L, Belzile E, Lambrou A, et al. The Effectiveness of Self-Management Interventions for Individuals with Low Health Literacy and/or Low Income: A Descriptive Systematic Review. *Journal of General Internal Medicine*. 2018.
14. Michie S, Abraham C, Whittington C, McAteer J, Gupta S. Effective techniques in healthy eating and physical activity interventions: a meta-regression. *Health Psychology*. 2009;28(6):690.
15. Ayre J, Bonner C, Cvejic E, McCaffery K. Randomized trial of planning tools to reduce unhealthy snacking: implications for health literacy. *PloS one*2019; 14(1), e0209863.
16. Armitage CJ. Field experiment of a very brief worksite intervention to improve nutrition among health care workers. *Journal of Behavioral Medicine*. 2015;38(4):599-608.
17. Smith SG, Curtis LM, Wardle J, von Wagner C, Wolf MS. Skill Set or Mind Set? Associations between Health Literacy, Patient Activation and Health. *PLOS ONE*. 2013;8(9):e74373.

## ACCOUNTING FOR HEALTH LITERACY AND INTERVENTION PREFERENCES

- 1  
2  
3 18. Nguyen MH, Smets EMA, Bol N, Loos EF, Van Weert JCM. How Tailoring the  
4 Mode of Information Presentation Influences Younger and Older Adults' Satisfaction with  
5 Health Websites. *Journal of Health Communication*. 2018;1-11.  
6  
7  
8  
9  
10 19. Preference Collaborative Review Group. Patients' preferences within randomised  
11 trials: systematic review and patient level meta-analysis. *BMJ*. 2008;337.  
12  
13  
14 20. Hendrie G, Baird D, Golley R, Noakes M. The CSIRO Healthy Diet Score: An Online  
15 Survey to Estimate Compliance with the Australian Dietary Guidelines. *Nutrients*.  
16  
17 2017;9(1):47.  
18  
19  
20  
21 21. Rücker G. A two-stage trial design for testing treatment, self-selection and treatment  
22 preference effects. *Statistics in Medicine*. 1989;8(4):477-85.  
23  
24  
25 22. Walter S, Turner R, Macaskill P, McCaffery K, Irwig L. Beyond the treatment effect:  
26 Evaluating the effects of patient preferences in randomised trials. *Statistical Methods in*  
27  
28  
29  
30  
31  
32  
33  
34 23. Weiss BD, Mays MZ, Martz W, Castro KM, DeWalt DA, Pignone MP, et al. Quick  
35 assessment of literacy in primary care: the newest vital sign. *Ann Fam Med*. 2005;3(6):514-  
36  
37  
38  
39  
40 24. Wallace LS, Rogers ES, Roskos SE, Holiday DB, Weiss BD. BRIEF REPORT:  
41 Screening Items to Identify Patients with Limited Health Literacy Skills. *Journal of General*  
42  
43  
44  
45  
46  
47  
48  
49  
50  
51  
52  
53 26. Nikoloudakis IA, Crutzen R, Rebar AL, Vandelanotte C, Quester P, Dry M, et al. Can  
54 you elaborate on that? Addressing participants' need for cognition in computer-tailored  
55  
56  
57  
58  
59  
60

## ACCOUNTING FOR HEALTH LITERACY AND INTERVENTION PREFERENCES

- 1  
2  
3 27. Verhoeven AAC, Adriaanse MA, de Ridder DTD, de Vet E, Fennis BM. Less is  
4 more: The effect of multiple implementation intentions targeting unhealthy snacking habits.  
5  
6 European Journal of Social Psychology. 2013;43(5):344-54.  
7  
8  
9  
10 28. Verhoeven AAC, Adriaanse MA, de Vet E, Fennis BM, de Ridder DTD. Identifying  
11 the 'if' for 'if-then' plans: Combining implementation intentions with cue-monitoring  
12  
13 targeting unhealthy snacking behaviour. Psychology & Health. 2014;29(12):1476-92.  
14  
15  
16  
17 29. Verplanken B, Orbell S. Reflections on Past Behavior: A Self-Report Index of Habit  
18 Strength. Journal of Applied Social Psychology. 2003;33(6):1313-30.  
19  
20  
21 30. Sniehotta FF, Scholz U, Schwarzer R. Bridging the intention-behaviour gap:  
22  
23 Planning, self-efficacy, and action control in the adoption and maintenance of physical  
24  
25 exercise. Psychology & Health. 2005;20(2):143-60.  
26  
27  
28 31. Turner RM, Walter SD, Macaskill P, McCaffery KJ, Irwig L. Sample Size and Power  
29  
30 When Designing a Randomized Trial for the Estimation of Treatment, Selection, and  
31  
32 Preference Effects. Medical Decision Making. 2014;34(6):711-9.  
33  
34  
35 32. McCaffery KJ, Turner R, Macaskill P, Walter SD, Chan SF, Irwig L. Determining the  
36  
37 Impact of Informed Choice: Separating Treatment Effects from the Effects of Choice and  
38  
39 Selection in Randomized Trials. Medical Decision Making. 2011;31(2):229-36.  
40  
41  
42 33. Cameron B, Peduzzi P, Esserman D. Extensions to the two-stage randomized trial  
43  
44 design for testing treatment, self-selection, and treatment preference effects to binary  
45  
46 outcomes. Statistics in Medicine. 2018;37(22):3147-78.  
47  
48  
49  
50  
51  
52  
53  
54  
55  
56  
57  
58  
59  
60

## ACCOUNTING FOR HEALTH LITERACY AND INTERVENTION PREFERENCES

### Authors' contributions

Conceptualisation, methodology, writing – review and editing: JA, CB, EC, RT, SW, KM

Investigation, project administration: JA

Writing – original draft preparation: JA, EC, RT

Software: RT

Supervision: EC, CB, KM

Funding acquisition: CB, JA, RT, KM

### Data availability statement

There are no data in this work. No data are as yet available for this study as recruitment is currently under way.

### Funding statement

This work was supported by Diabetes Australia, grant number G199678. This research is also supported by an Australian Government Research Training Program (RTP) Scholarship.

### Competing interests statement

Authors have no competing interests.

### Acknowledgements

We would like to thank our type 2 diabetes consumer health representatives Edward Hartley and Mike Font for their feedback and input into the design of this study. We would also like to acknowledge the CSIRO for their permission to use items from the discretionary foods components of the CSIRO diet score.



Figure 1: Anticipated participant recruitment and attrition to achieve sufficient sample size



**Smart snacking**



**Step 1: Snack moments**

Sometimes we snack because we are hungry, but there are lots of other reasons too.

Below is a list of 'snack moments.' These are times when people tend to choose unhealthy snacks or eat too much.

Choose 3 snack moments from the list that happened to you the **most often** in the **last week**.

**I often eat unhealthy snacks when...**

|                                   |                         |                             |
|-----------------------------------|-------------------------|-----------------------------|
| the snack is right in front of me | I am happy              | I have a craving            |
| someone offers me a snack         | I am sad                | I am drinking alcohol       |
| people around me are eating       | I want to reward myself | I am drinking tea or coffee |

**Step 2: Your 'key' snack moment**

Below are your top 3 snack moments.

Some snack moments will be more important than others. Choose the **1** that you would be **happiest** to change.

**I really want to change my habit of snacking when...**

|            |                       |                                   |
|------------|-----------------------|-----------------------------------|
| I am bored | I am busy or stressed | I am in front of a TV or computer |
|------------|-----------------------|-----------------------------------|

**Step 3: Make a plan**

Great! Your key snack moment is:  
Eating unhealthy snacks when I am **bored**

The last step is to come up with a plan!  
**Choose the solution that you think will work best for you.**

Drag it into the space on the right

**Items**

- go for a walk
- listen to music
- take a break
- chat to someone for 5 minutes
- drink tea

**If I want a snack because I am bored, I will...**

- 1 drink a large glass of water

**Step 4: Your plan is almost ready!**

Here is your plan so far:

If I want a snack because I am bored

then I will drink a large glass of water

Imagine how your plan might feel.  
**When do you feel bored?**  
Sometimes you might eat unhealthy snacks while you:

- wait for a friend
- take a long train or bus trip
- watch TV
- do jobs or chores you do not like

If this happens, and you want an unhealthy snack, do you think you could drink a large glass of water instead?

Figure 2: Mobile screenshots from literacy-sensitive action plan. From left to right: a) Step 1: Selecting top 3 snacking scenarios; b) Step 2: Selecting 1 key scenario; c) Step 3: Selecting a solution; d) Step 4: Imagining the plan



## Study Information Sheet: Smart snacking: An online planning tool



### What is the study about?

We are doing a research study to find out more about tools to help people eat less unhealthy snacks. While many of us want to change the way we snack, this can be very hard. Often we make plans but have trouble sticking to them over long periods of time. This study will look at online tools that help people stick to their plans.

### Who is carrying out the study?

We are from the School of Public Health at the University of Sydney. Our names are:

- Julie Ayre
- Carissa Bonner
- Robin Turner
- Erin Cvejic
- Kirsten McCaffery
- Stephen Walter

### What will happen if I say that I want to be in the study?

You can decide if you want to take part in the study or not. Please read this sheet carefully so that you can make up your mind about whether you want to take part. Completing a question in the online survey is an indication of your consent to take part in the study.

You may stop completing the online survey at any point if you do not wish to continue, and we will not use your answers. You do not have to give a reason for not taking part. Once you have submitted your survey anonymously, your responses cannot be withdrawn.

If you decide that you want to be in our study, we will ask you to:

1. Complete questions online (for example, about the foods you eat and snacking habits)
2. Use the online planning tool to create a plan to help you eat less unhealthy snacks. We will ask you to follow the plan for 4 weeks. You will receive 3 reminder messages about your plan during that time.
3. Complete questions online about your snacking behaviour and your plan after 4 weeks.

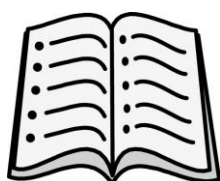

### Will anyone else know what I say in the study?

All of the information that we have about you from the study will be confidential. It will be stored in a safe place at the University of Sydney.

We will write a report about the study and show it to other people but no one will know that you were in the study.

### How long will the study take?

- The **first part** of the study will take about **20 minutes**.
- You will be asked to **try out your snacking plan** for **4 weeks**.
- The **second part** of the study (after 4 weeks) will take about **10 minutes**.

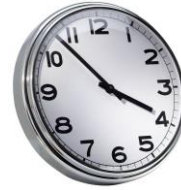

### Are there any good things about being in the study?

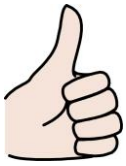

This study may help you think more about the way that you snack. This is the first step to changing your eating patterns.

### Are there any bad things about being in the study?

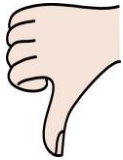

This study will take up some of your time, but we don't think it will be bad for you or cost you anything.

By giving your consent to take part in this study you are telling us that you:

- ✓ Understand what you have read.
- ✓ Agree to take part in the research study as described above.
- ✓ Agree to the use of your personal information for the research purposes described above.

### What if I want more information about the study or my involvement in it?

You can contact the researcher Julie Ayre:

- **Call:** (02) 9351 7789
- **Email:** [julie.ayre@sydney.edu.au](mailto:julie.ayre@sydney.edu.au).

### What if I am not happy with the study or the people doing the study?

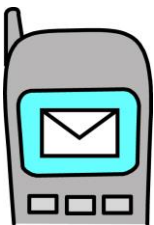

The ethical aspects of this study have been approved by the HREC of the University of Sydney [Project Number 2018/793].

If you are not happy with how we are doing the study or how we treat you, then you can:

- **Call** the university on +61 2 8627 8176 or
- Write an **email** to [human.ethics@sydney.edu.au](mailto:human.ethics@sydney.edu.au)

## ACCOUNTING FOR HEALTH LITERACY AND INTERVENTION PREFERENCES

## Supplementary Material: Behaviour Change Techniques present in intervention

**Supplementary Table 1: Behaviour Change Techniques present in intervention**

| <b>Intervention</b>       | <b>Intervention feature</b>                                         | <b>Behaviour change technique</b>            |
|---------------------------|---------------------------------------------------------------------|----------------------------------------------|
| <b>Literacy-sensitive</b> | The text 'forming plans has shown to improve snacking habits'       | Credible source                              |
|                           | Identifying situations for unhealthy snacking                       | Problem solving                              |
|                           | Identifying an alternative behaviour to enact in snacking situation | Behaviour substitution                       |
|                           | Generation of plan (with images) to reduce unhealthy snacking       | Action planning                              |
|                           | Instruction to imagine enacting the plan                            | Mental rehearsal of a successful performance |
| <b>Standard</b>           | Reminder emails                                                     | Prompts/cues                                 |
|                           | The text 'forming plans has shown to improve snacking habits'       | Credible source                              |
|                           | Identifying situations for unhealthy snacking                       | Problem solving                              |
|                           | Generation of plan to reduce unhealthy snacking                     | Action planning                              |
|                           | Reminder emails                                                     | Prompts/cues                                 |

**Note: Behaviour Change Techniques are based on the Behaviour Change Technique Taxonomy v1 (Michie et al., 2013)**

**SPIRIT 2013 Checklist: Recommended items to address in a clinical trial protocol and related documents\***

| Section / Item                    | Item Number | Description                                                                                                                                                                                                                                                                              |                              |
|-----------------------------------|-------------|------------------------------------------------------------------------------------------------------------------------------------------------------------------------------------------------------------------------------------------------------------------------------------------|------------------------------|
| <b>Administrative information</b> |             |                                                                                                                                                                                                                                                                                          |                              |
| Title                             | 1           | Descriptive title identifying the study design, population, interventions, and, if applicable, trial acronym                                                                                                                                                                             | 1                            |
| Trial registration                | 2a          | Trial identifier and registry name. If not yet registered, name of intended registry                                                                                                                                                                                                     | 3                            |
|                                   | 2b          | All items from the World Health Organization Trial Registration Data Set                                                                                                                                                                                                                 | 3<br>(available from ANZCTR) |
| Protocol version                  | 3           | Date and version identifier                                                                                                                                                                                                                                                              | 3 (As shown in ANZCTR)       |
| Funding                           | 4           | Sources and types of financial, material, and other support                                                                                                                                                                                                                              | 24                           |
| Roles and responsibilities        | 5a          | Names, affiliations, and roles of protocol contributors                                                                                                                                                                                                                                  | Role 24                      |
|                                   | 5b          | Name and contact information for the trial sponsor                                                                                                                                                                                                                                       | 1                            |
|                                   | 5c          | Role of study sponsor and funders, if any, in study design; collection, management, analysis, and interpretation of data; writing of the report; and the decision to submit the report for publication, including whether they will have ultimate authority over any of these activities | 24                           |
|                                   | 5d          | Composition, roles, and responsibilities of the coordinating centre, steering committee, endpoint adjudication committee, data management team, and other individuals or groups overseeing the trial, if applicable (see Item 21a for data monitoring committee)                         | N/A                          |
| <b>Introduction</b>               |             |                                                                                                                                                                                                                                                                                          |                              |
| Background and rationale          | 6a          | Description of research question and justification for undertaking the trial, including summary of relevant studies (published and unpublished) examining benefits and harms for each intervention                                                                                       | 4-6                          |
|                                   | 6b          | Explanation for choice of comparators                                                                                                                                                                                                                                                    | 4-5                          |

|              |   |                                                                                                                                                                                                           |     |
|--------------|---|-----------------------------------------------------------------------------------------------------------------------------------------------------------------------------------------------------------|-----|
| Objectives   | 7 | Specific objectives or hypotheses                                                                                                                                                                         | 5-6 |
| Trial design | 8 | Description of trial design including type of trial (eg, parallel group, crossover, factorial, single group), allocation ratio, and framework (eg, superiority, equivalence, noninferiority, exploratory) | 6   |

For peer review only

| <b>Methods: Participants, interventions, and outcomes</b> |     |                                                                                                                                                                                                                                                                                                                                                                                |                          |
|-----------------------------------------------------------|-----|--------------------------------------------------------------------------------------------------------------------------------------------------------------------------------------------------------------------------------------------------------------------------------------------------------------------------------------------------------------------------------|--------------------------|
| Study setting                                             | 9   | Description of study settings (eg, community clinic, academic hospital) and list of countries where data will be collected. Reference to where list of study sites can be obtained                                                                                                                                                                                             | 6-7                      |
| Eligibility criteria                                      | 10  | Inclusion and exclusion criteria for participants. If applicable, eligibility criteria for study centres and individuals who will perform the interventions (eg, surgeons, psychotherapists)                                                                                                                                                                                   | 7                        |
| Interventions                                             | 11a | Interventions for each group with sufficient detail to allow replication, including how and when they will be administered                                                                                                                                                                                                                                                     | 9-12                     |
|                                                           | 11b | Criteria for discontinuing or modifying allocated interventions for a given trial participant (eg, drug dose change in response to harms, participant request, or improving/worsening disease)                                                                                                                                                                                 | N/A                      |
|                                                           | 11c | Strategies to improve adherence to intervention protocols, and any procedures for monitoring adherence (eg, drug tablet return, laboratory tests)                                                                                                                                                                                                                              | 12<br>(reminders emails) |
|                                                           | 11d | Relevant concomitant care and interventions that are permitted or prohibited during the trial                                                                                                                                                                                                                                                                                  | N/A                      |
| Outcomes                                                  | 12  | Primary, secondary, and other outcomes, including the specific measurement variable (eg, systolic blood pressure), analysis metric (eg, change from baseline, final value, time to event), method of aggregation (eg, median, proportion), and time point for each outcome. Explanation of the clinical relevance of chosen efficacy and harm outcomes is strongly recommended | 13-14                    |
| Participant timeline                                      | 13  | Time schedule of enrolment, interventions (including any run-ins and washouts), assessments, and visits for participants. A schematic diagram is highly recommended (see Figure)                                                                                                                                                                                               | 8 (fig 1);<br>12         |
| Sample size                                               | 14  | Estimated number of participants needed to achieve study objectives and how it was determined, including clinical and statistical assumptions supporting any sample size calculations                                                                                                                                                                                          | 14-15                    |
| Recruitment                                               | 15  | Strategies for achieving adequate participant enrolment to reach target sample size                                                                                                                                                                                                                                                                                            | 6-7; 14-15               |

| <b>Methods: Assignment of interventions (for controlled trials)</b> |     |                                                                                                                                                                                                                                                                                                                                                                                                              |                          |
|---------------------------------------------------------------------|-----|--------------------------------------------------------------------------------------------------------------------------------------------------------------------------------------------------------------------------------------------------------------------------------------------------------------------------------------------------------------------------------------------------------------|--------------------------|
| <b>Allocation</b>                                                   |     |                                                                                                                                                                                                                                                                                                                                                                                                              |                          |
| Sequence generation                                                 | 16a | Method of generating the allocation sequence (eg, computer generated random numbers), and list of any factors for stratification. To reduce predictability of a random sequence, details of any planned restriction (eg, blocking) should be provided in a separate document that is unavailable to those who enrol participants or assign interventions                                                     | 7                        |
| Allocation concealment mechanism                                    | 16b | Mechanism of implementing the allocation sequence (eg, central telephone; sequentially numbered, opaque, sealed envelopes), describing any steps to conceal the sequence until interventions are assigned                                                                                                                                                                                                    | 7                        |
| Implementation                                                      | 16c | Who will generate the allocation sequence, who will enrol participants, and who will assign participants to interventions                                                                                                                                                                                                                                                                                    | 7                        |
| Blinding (masking)                                                  | 17a | Who will be blinded after assignment to interventions (eg, trial participants, care providers, outcome assessors, data analysts), and how                                                                                                                                                                                                                                                                    | 18                       |
|                                                                     | 17b | If blinded, circumstances under which unblinding is permissible, and procedure for revealing a participant's allocated intervention during the trial                                                                                                                                                                                                                                                         | N/A                      |
| <b>Methods: Data collection, management, and analysis</b>           |     |                                                                                                                                                                                                                                                                                                                                                                                                              |                          |
| Data collection methods                                             | 18a | Plans for assessment and collection of outcome, baseline, and other trial data, including any related processes to promote data quality (eg, duplicate measurements, training of assessors) and a description of study instruments (eg, questionnaires, laboratory tests) along with their reliability and validity, if known. Reference to where data collection forms can be found, if not in the protocol | 12-14                    |
|                                                                     | 18b | Plans to promote participant retention and complete follow-up, including list of any outcome data to be collected for participants who discontinue or deviate from intervention protocols                                                                                                                                                                                                                    | 12<br>(reminders emails) |
| Data management                                                     | 19  | Plans for data entry, coding, security, and storage, including any related processes to promote data quality (eg, double data entry; range checks for data values). Reference to where details of data management procedures can be found, if not in the protocol                                                                                                                                            | 18-19                    |



1  
2  
3  
4  
5  
6  
7  
8  
9  
10  
11  
12  
13  
14  
15  
16  
17  
18  
19  
20  
21  
22  
23  
24  
25  
26  
27  
28  
29  
30  
31  
32  
33  
34  
35  
36  
37  
38  
39  
40  
41  
42  
43  
44  
45  
46

|                                 |     |                                                                                                                                                                                                                                                                                                                                       |                                                                      |
|---------------------------------|-----|---------------------------------------------------------------------------------------------------------------------------------------------------------------------------------------------------------------------------------------------------------------------------------------------------------------------------------------|----------------------------------------------------------------------|
| Statistical methods             | 20a | Statistical methods for analysing primary and secondary outcomes. Reference to where other details of the statistical analysis plan can be found, if not in the protocol                                                                                                                                                              | 16-18                                                                |
|                                 | 20b | Methods for any additional analyses (eg, subgroup and adjusted analyses)                                                                                                                                                                                                                                                              | 16-18                                                                |
|                                 | 20c | Definition of analysis population relating to protocol non-adherence (eg, as randomised analysis), and any statistical methods to handle missing data (eg, multiple imputation)                                                                                                                                                       | 16                                                                   |
| <b>Methods: Monitoring</b>      |     |                                                                                                                                                                                                                                                                                                                                       |                                                                      |
| Data monitoring                 | 21a | Composition of data monitoring committee (DMC); summary of its role and reporting structure; statement of whether it is independent from the sponsor and competing interests; and reference to where further details about its charter can be found, if not in the protocol. Alternatively, an explanation of why a DMC is not needed | N/A                                                                  |
|                                 | 21b | Description of any interim analyses and stopping guidelines, including who will have access to these interim results and make the final decision to terminate the trial                                                                                                                                                               | 15                                                                   |
| Harms                           | 22  | Plans for collecting, assessing, reporting, and managing solicited and spontaneously reported adverse events and other unintended effects of trial interventions or trial conduct                                                                                                                                                     | Supp (PIS)                                                           |
| Auditing                        | 23  | Frequency and procedures for auditing trial conduct, if any, and whether the process will be independent from investigators and the sponsor                                                                                                                                                                                           | N/A                                                                  |
| <b>Ethics and dissemination</b> |     |                                                                                                                                                                                                                                                                                                                                       |                                                                      |
| Research and ethics approval    | 24  | Plans for seeking research ethics committee/institutional review board (REC/IRB) approval                                                                                                                                                                                                                                             | 19                                                                   |
| Protocol amendments             | 25  | Plans for communicating important protocol modifications (eg, changes to eligibility criteria, outcomes, analyses) to relevant parties (eg, investigators, REC/IRBs, trial participants, trial registries, journals, regulators)                                                                                                      | N/A as not anticipated; however protocol updates can be as per trial |

|                               |     |                                                                                                                                                                                                                                                                                     |                  |
|-------------------------------|-----|-------------------------------------------------------------------------------------------------------------------------------------------------------------------------------------------------------------------------------------------------------------------------------------|------------------|
|                               |     |                                                                                                                                                                                                                                                                                     | registry pg<br>3 |
| Consent or assent             | 26a | Who will obtain informed consent or assent from potential trial participants or authorised surrogates, and how (see Item 32)                                                                                                                                                        | 6-7, Supp<br>PIS |
|                               | 26b | Additional consent provisions for collection and use of participant data and biological specimens in ancillary studies, if applicable                                                                                                                                               | N/A              |
| Confidentiality               | 27  | How personal information about potential and enrolled participants will be collected, shared, and maintained in order to protect confidentiality before, during, and after the trial                                                                                                | 18-19            |
| Declaration of interests      | 28  | Financial and other competing interests for principal investigators for the overall trial and each study site                                                                                                                                                                       | 22               |
| Access to data                | 29  | Statement of who will have access to the final trial dataset, and disclosure of contractual agreements that limit such access for investigators                                                                                                                                     | 19               |
| Ancillary and post-trial care | 30  | Provisions, if any, for ancillary and post-trial care, and for compensation to those who suffer harm from trial participation                                                                                                                                                       | N/A              |
| Dissemination policy          | 31a | Plans for investigators and sponsor to communicate trial results to participants, healthcare professionals, the public, and other relevant groups (eg, via publication, reporting in results databases, or other data sharing arrangements), including any publication restrictions | 18               |
|                               | 31b | Authorship eligibility guidelines and any intended use of professional writers                                                                                                                                                                                                      | N/A              |
|                               | 31c | Plans, if any, for granting public access to the full protocol, participant level dataset, and statistical code                                                                                                                                                                     | 3, 18-19         |
| <b>Appendices</b>             |     |                                                                                                                                                                                                                                                                                     |                  |
| Informed consent materials    | 32  | Model consent form and other related documentation given to participants and authorised surrogates                                                                                                                                                                                  | Supp PIS         |
| Biological specimens          | 33  | Plans for collection, laboratory evaluation, and storage of biological specimens for genetic or molecular analysis in the current trial and for future use in ancillary studies, if applicable                                                                                      | N/A              |

1  
2  
3  
4  
5  
6  
7  
8  
9  
10  
11  
12  
13  
14  
15  
16  
17  
18  
19  
20  
21  
22  
23  
24  
25  
26  
27  
28  
29  
30  
31  
32  
33  
34  
35  
36  
37  
38  
39  
40  
41  
42  
43  
44  
45  
46

\*It is strongly recommended that this checklist be read in conjunction with the SPIRIT 2013 Explanation & Elaboration for important clarification on the items. Amendments to the protocol should be tracked and dated. The SPIRIT checklist is copyrighted by the SPIRIT Group under the Creative Commons “Attribution-NonCommercial-NoDerivs 3.0 Unported” license.

For peer review only
