# Supplementary material for: Accounting for health literacy and intervention preferences when reducing unhealthy snacking: protocol for an online randomised controlled trial
Source: PubMed Central journal article supplement — BMJ Open. 2019 May 28;9(5):e028544. doi: 10.1136/bmjopen-2018-028544 (PMC6549624; doi:10.1136/bmjopen-2018-028544), 2019-05-28
Supplement: bmjopen-2018-028544supp002.pdf [file bmjopen-2018-028544supp002.pdf]

## Supplementary Material: Behaviour Change Techniques present in intervention

**Supplementary Table 1: Behaviour Change Techniques present in intervention**

| <b>Intervention</b>       | <b>Intervention feature</b>                                         | <b>Behaviour change technique</b>            |
|---------------------------|---------------------------------------------------------------------|----------------------------------------------|
| <b>Literacy-sensitive</b> | The text 'forming plans has shown to improve snacking habits'       | Credible source                              |
|                           | Identifying situations for unhealthy snacking                       | Problem solving                              |
|                           | Identifying an alternative behaviour to enact in snacking situation | Behaviour substitution                       |
|                           | Generation of plan (with images) to reduce unhealthy snacking       | Action planning                              |
|                           | Instruction to imagine enacting the plan                            | Mental rehearsal of a successful performance |
| <b>Standard</b>           | Reminder emails                                                     | Prompts/cues                                 |
|                           | The text 'forming plans has shown to improve snacking habits'       | Credible source                              |
|                           | Identifying situations for unhealthy snacking                       | Problem solving                              |
|                           | Generation of plan to reduce unhealthy snacking                     | Action planning                              |
|                           | Reminder emails                                                     | Prompts/cues                                 |

**Note: Behaviour Change Techniques are based on the Behaviour Change Technique Taxonomy v1 (Michie et al., 2013)**
